# Supplementary material for: Barriers to malaria prevention among immigrant travelers in the United States who visit friends and relatives in sub-Saharan Africa: A cross-sectional, multi-setting survey of knowledge, attitudes, and practices
Source: PubMed Central journal article supplement (PMC7067457; doi:10.1371/journal.pone.0229565), 2020-03-12
Supplement: pone.0229565.s001.pdf [file pone.0229565.s001.pdf]

### Supplement 3: STROBE Statement Checklist for Cross-Sectional Studies

Supplement to: Barriers to malaria prevention among immigrant travelers who visit friends and relatives in sub-Saharan Africa: A cross-sectional, multi-setting survey of knowledge, attitudes, and practices

| Section                    | Checklist item                                                                                                                                                                       | Line number or description of location / inclusion in manuscript                                                                                                                  |
|----------------------------|--------------------------------------------------------------------------------------------------------------------------------------------------------------------------------------|-----------------------------------------------------------------------------------------------------------------------------------------------------------------------------------|
| <b>Title and abstract</b>  | (a) Indicate the study's design with a commonly used term in the title or the abstract                                                                                               | Line 2: Cross-sectional survey                                                                                                                                                    |
|                            | (b) Provide in the abstract an informative and balanced summary of what was done and what was found                                                                                  | Lines 23-57: Includes section headers, rationale, approach, key findings, and significance.                                                                                       |
| <b>Introduction</b>        |                                                                                                                                                                                      |                                                                                                                                                                                   |
| Background / rationale     | Explain the scientific background and rationale for the investigation being reported                                                                                                 | Lines 59-91: Background on VFRs and malaria in travelers, rationale for focus on VFR travelers to sub-Saharan Africa.                                                             |
| Objectives                 | State specific objectives, including any prespecified hypotheses                                                                                                                     | Lines 92-96: Specific objectives – identify differences in malaria prevention knowledge, attitudes, and practices among VFRs, and describe differences between VFRs and non-VFRs. |
| <b>Methods</b>             |                                                                                                                                                                                      |                                                                                                                                                                                   |
| Study design               | Present key elements of study design early in the paper                                                                                                                              | Lines 92-94: conducted a comprehensive community-based, cross-sectional survey of US travelers to malaria endemic countries in sub-Saharan Africa.                                |
| Setting                    | Describe the setting, locations, and relevant dates, including periods of recruitment, exposure, follow-up, and data collection                                                      | Malaria cases: lines 109-117<br>VFRs in the community: lines 118-138<br>Travel clinic patients: 139-147                                                                           |
| Participants               | Give the eligibility criteria, and the sources and methods of selection of participants                                                                                              | Malaria cases: lines 109-117<br>VFRs in the community: lines 118-138<br>Travel clinic patients: 139-147                                                                           |
| Variables                  | Clearly define all outcomes, exposures, predictors, potential confounders, and effect modifiers. Give diagnostic criteria, if applicable                                             | Lines 173-181: Describe variables<br>Supplemental Material 2: Provides complete assessment tools with all variables and their structure                                           |
| Data sources / measurement | For each variable of interest, give sources of data and details of methods of assessment (measurement). Describe comparability of assessment methods if there is more than one group | Supplemental Material 2: Provides complete assessment tools with all variables and their structure<br>Lines 182-184 Comparability of assessment methods for groups                |
| Bias                       | Describe any efforts to address potential sources of bias                                                                                                                            | Lines 213-214: interviewer training and rapport development<br>Lines 215-224: Reduction of bias through survey standardization across languages                                   |
| Study size                 | Explain how the study size was arrived at                                                                                                                                            | Lines 153-160 and Figure 2: Recruitment targets for each arm of the survey and Figure 2                                                                                           |
| Quantitative variables     | Explain how quantitative variables were handled in the analyses. If applicable, describe which groupings were chosen and why                                                         | Lines 229-237: dataset integration, rationale and explanation of groupings                                                                                                        |
| Statistical methods        | (a) Describe all statistical methods, including those used to control for confounding                                                                                                | Lines 244-253: Statistical methods, transformations for non-normality, significance level                                                                                         |
|                            | (b) Describe methods used to examine subgroups and interactions                                                                                                                      | Lines 244-253: Parametric and non-parametric comparative analyses                                                                                                                 |

|                          |                                                                                                                                                                                                               |                                                                                                                                  |
|--------------------------|---------------------------------------------------------------------------------------------------------------------------------------------------------------------------------------------------------------|----------------------------------------------------------------------------------------------------------------------------------|
|                          | (c) Explain how missing data were addressed                                                                                                                                                                   | Lines 262-385: All comparative analyses in results include sample n's to indicate missing data.                                  |
|                          | (d) If applicable, describe analytical methods taking account of sampling strategy                                                                                                                            | Lines 234-237: Approach to combining responses across study arms, noting non-case-control sampling strategy (Figure 2)           |
|                          | (e) Describe any sensitivity analyses                                                                                                                                                                         | Not applicable                                                                                                                   |
| <b>Results</b>           |                                                                                                                                                                                                               |                                                                                                                                  |
| Participants             | (a) Report numbers of individuals at each stage of study—e.g. numbers potentially eligible, examined for eligibility, confirmed eligible, included in the study, completing follow-up, and analyzed           | Line 161 – Figure 2<br>Line 262.                                                                                                 |
|                          | (b) Give reasons for non-participation at each stage                                                                                                                                                          | Line 161 – Figure 2 eligibility and loss-to-follow up in the travel clinic arm                                                   |
|                          | (c) Consider use of a flow diagram                                                                                                                                                                            | Line 161 – Figure 2                                                                                                              |
| Descriptive data         | (a) Give characteristics of study participants (e.g. demographic, clinical, social), information on exposures / potential confounders                                                                         | Line 279 – Table 1<br>Lines 262-269                                                                                              |
|                          | (b) Indicate number of participants with missing data for each variable of interest                                                                                                                           | Lines 271-385: All comparative analyses in results include sample n's to indicate missing data.                                  |
| Outcome data             | Report numbers of outcome events or summary measures                                                                                                                                                          | Table 1, Table 2, Table 3                                                                                                        |
| Main results             | (a) Give unadjusted estimates and, if applicable, confounder-adjusted estimates and their precision (e.g. 95% confidence interval). Make clear which confounders were adjusted for and why they were included | Lines 271-385<br>Table 1, Table 2, Table 3, Figure 4                                                                             |
|                          | (b) Report category boundaries when continuous variables were categorized                                                                                                                                     | Line 279 - Table 1: trip count threshold at 5 trips, dichotomous education thresholds at grade school and high school cut points |
|                          | (c) If relevant, consider translating estimates of relative risk into absolute risk for a meaningful time period                                                                                              | Not applicable                                                                                                                   |
| Other analyses           | Report other analyses done—e.g. analyses of subgroups and interactions, and sensitivity analyses                                                                                                              | Lines 271-363: subgroup comparative analyses                                                                                     |
| <b>Discussion</b>        |                                                                                                                                                                                                               |                                                                                                                                  |
| Key results              | Summarize key results with reference to study objectives                                                                                                                                                      | Lines 393-405                                                                                                                    |
| Limitations              | Discuss limitations of the study, taking into account sources of potential bias or imprecision. Discuss both direction and magnitude of any potential bias                                                    | Lines 480-512                                                                                                                    |
| Interpretation           | Give a cautious overall interpretation of results considering objectives, limitations, multiplicity of analyses, results from similar studies, and other relevant evidence                                    | Lines 407-429, lines 514-533                                                                                                     |
| Generalizability         | Discuss the generalizability (external validity) of the study results                                                                                                                                         | Lines 489-493                                                                                                                    |
| <b>Other information</b> |                                                                                                                                                                                                               |                                                                                                                                  |
| Funding                  | Give the source of funding and the role of the funders for the present study and, if applicable, for the original study on which the present article is based                                                 | Lines 254-259.                                                                                                                   |
