# Supplementary material for: Barriers to malaria prevention among immigrant travelers in the United States who visit friends and relatives in sub-Saharan Africa: A cross-sectional, multi-setting survey of knowledge, attitudes, and practices
Source: PLoS One. 2020 Mar 12;15(3):e0229565. doi: 10.1371/journal.pone.0229565 (PMC7067457; doi:10.1371/journal.pone.0229565)
Supplement: S1 Dataset — Data set contains de-identified data for eligible records and an accompanying data dictionary. (XLSX) [file pone.0229565.s002.xlsx]

## Sheet: Survey Dataset
a_code	a_eligible	a_setting	a_subset	a_w_af	a_vfr_reason	a_vfr_def	a_vfr_bin	a_male	a_age	a_adult	a_for_born	a_pob	a_mom_pob	a_dad_pob	a_residency_us	a_has_traveled	a_has_traveled_nofortravelclinic	a_trip_count_zeros	a_trip_cat	a_trip_bin	a_education	a_edu_gths	noc_live_elsewhere	noc_live_elsewhere_loc	noc_elsewhere_when	noc_elsewhere_length	noc_ethnicity	noc_pcp	noc_pcp_last	noc_notes	a_destination	a_destination_wa	a_travel_yr	a_duration	a_concern	a_deadly	a_deadlyminusconcern	a_contract_mosq	a_contract_water	a_contract_air	a_contract_person	a_contract_other	a_contract_wrong	a_preventable	a_prev_shot	a_prev_repellent	a_prev_nets	a_prev_meds	a_prev_avoidbite
C_002	1	2	2	1	1	1	1	0	51	1	1	Liberia	Liberia	Liberia	21	1	1	4	2	0	5	1									Liberia	1	2014	52	5	5	0	1					0	1	1			1
C_003	1	2	2	1	1	1	1	1	49	1	1	Cameroon	Cameroon	Cameroon	15	1	1	5	3	1	5	1									Cameroon	1	2015	2	5	5	0	1					0	1		1	1	1
C_004	1	2	2	1	1	1	1	1	45	1	1	Cameroon	Cameroon	Cameroon	15	1	1	3	2	0	5	1									Cameroon	1	2016	1	5	5	0	1					0	1			1	1
C_005	1	2	2	1	1	1	1	0	58	1	1	Cameroon	Cameroon	Cameroon	20	1	1	5	3	1	5	1									Cameroon	1	2011	53	5	5	0	1					0	1			1
C_006	1	2	2	1	1	1	1	0	45	1	1	Cameroon	Cameroon	Cameroon	8	0	0	0	1	0	5	1									Cameroon	1		4	5	5	0	1					0	1		1
C_007	1	2	2	1	1	1	1	0	47	1	1	Cameroon	Cameroon	Cameroon	28	1	1	4	2	0	3	1									Cameroon	1	2013	3	5	5	0	1					0	1		1	1
C_008	1	2	2	1	1	1	1	0	30	1	1	Cameroon	Cameroon	Cameroon	5	1	1	5	3	1	5	1									Cameroon	1	2016	6	5	5	0	1					0	1			1
C_009	1	2	2	1	1	1	1			1	1	Cameroon				1	1														Cameroon	1	2017	1				1					0	1		1		1
C_010	1	2	1	0	1	2	1	1	35	1	1	Kenya	Somalia	Africa	19	1	1	5	3	1	5	1									Kenya	0	2017	5	5	5	0					Living in tropical country not using proper precautions using	1
C_011	1	2	1	0	1	2	1	0	48	1	1	Somalia	Somalia	Somalia	14	0	0	0	1	0	0	0									Somalia	0		8	5	1	-4	1					0	1			1
C_012	1	2	1	0	1	2	1	0	30	1	1	Somalia	Somalia	Somalia	2	0	0	0	1	0	2	0									Kenya	0		8	5	5	0		1				1	1				1
C_013	1	2	1	0	1	2	1	0	36	1	1	Somalia	Somalia	Somalia	4	0	0	0	1	0	0	0									Kenya	0		8	5	5	0	1					0	0
C_014	1	2	1	0	1	2	1	1	30	1	1	Somalia	Somalia	Somalia	11	0	0	0	1	0	2	0									Somalia	0		12	4	4	0	1					0	1	1
C_015	1	2	1	0	1	2	1	0	23	1	1	Somalia	Somalia	Somalia	5	0	0	0	1	0	0	0									Kenya	0		12	5	5	0	1					0	0
C_017	1	2	1	0	1	2	1	0	33	1	1	Ethiopia	Ethiopia	Ethiopia	15	1	1	1	1	0	1	0									Ethiopia	0	2016	4	1	1	0			1			1	1
C_019	1	2	1	0	1	2	1	0	38	1	1	Somalia	Somalia	Somalia	12	1	1	1	1	0	0	0									Somalia	0	2016	8	5	5	0	1	1				1	1			1
C_020	1	2	1	0	1	2	1	0	30	1	1	Ethiopia	Ethiopia	Ethiopia	14	1	1	1	1	0	2	0									Ethiopia Kenya	0	2015	13	1	2	1
C_021	1	2	1	0	1	2	1	0	20	1	1	Somalia	Somalia	Somalia	0.25	0	0	0	1	0	0	0									Kenya	0		12	4	2	-2	1					0	1				1
C_022	1	2	1	0	1	2	1	0	32	1	1	Somalia	Somalia	Somalia		1	1	3	2	0	4	1									Somalia Kenya	0	2017	4	4	4	0	1					0	1		1	1
C_023	1	2	1	0	1	2	1	0	29	1	1	Kenya	Somalia	Kenya	5	1	1	1	1	0	0	0									South Africa	0	2016	6	2	2	0	1					0	1				1
C_024	1	2	1	0	1	2	1	0	40	1	1	Somalia	Somalia	Somalia	13	1	1	2	2	0	2	0									Somalia	0	2018	8		5								0
C_025	1	2	1	1	1	1	1	1	41	1	1	Liberia	Liberia	Liberia	21	1	1	1	1	0	5	1									Liberia Ghana	1	2010	3		5		1					0	1				1
C_027	1	2	1	0	1	2	1	0	35	1	1	Somalia	Somalia	Somalia	17	0	0	0	1	0	2	0									Kenya	0		12	5	5	0	1	1				1	1
C_028	1	2	1	0	1	2	1	0	45	1	1	Ethiopia	Ethiopia	Ethiopia	3	0	0	0	1	0	0	0									Kenya	0		8	4	5	1	1					0	1			1	1
C_029	1	2	1	0	1	2	1	0	65	1	1	Somalia	Somalia	Somalia	4	0	0	0	1	0	0	0									Somalia	0		4	4	5	1	1					0	1				1
C_030	1	2	1	0	1	2	1	0	50	1	1	Somalia	Somalia	Somalia	24	1	1	1	1	0	2	0									Somalia Kenya	0	2018	6	5	5	0	1					0	0
C_031	1	2	2	1	1	1	1	1	62	1	1	Nigeria	Nigeria	Nigeria	30	1	1	5	3	1	5	1									Nigeria	1	2018	4	3	5	2	1					0	1				1
C_032	1	2	1	0	1	2	1	0	60	1	1	Uganda	Somalia	Somalia	7	0	0	0	1	0	0	0									Somalia	0		12	5	5	0	1					0	1			1	1
C_033	1	2	1	1	1	1	1	0	32	1	1	Liberia	Liberia	Liberia	15	0	0	0	1	0	4	1									Liberia	1		2	5	5	0	1					0	1
C_034	1	2	1	0	1	2	1	1	33	1	1	Sudan	Sudan	Sudan	0.33	1	1	1	1	0	5	1									Sudan	0	2018	4	5	5	0	1					0	1			1
C_035	1	2	1	0	1	2	1	0	23	1	1	Sudan	Sudan	Sudan	15	1	1	5	3	1	5	1									Sudan	0	2017	4	1	5	4	1					0	1			1	1
C_036	1	2	1	0	1	2	1	0	28	1	1	Zimbabwe	Zimbabwe	Zimbabwe	5	1	1	5	3	1	5	1									Zimbabwe	0	2018	3	1	5	4	1					0	1		1	1	1
C_037	1	2	1	0	1	2	1	0	24	1	1	Zimbabwe	Zimbabwe	Zimbabwe	6	1	1	4	2	0	5	1									Zimbabwe South Africa Namibia	0	2016	2	2	5	3	1				sub Saharan Africa	0	1				1
C_038	1	2	1	1	1	1	1			1	1	Sierra Leone				1	1														Sierra Leone Liberia	1	2017	3	5	5	0					Anywhere		0
C_039	1	2	1	1	1	1	1	0	31	1	1	Guinea	Guinea	Guinea	15	0	0	0	1	0	4	1									Guinea	1		4	3	4	1		1				1	1
C_040	1	2	1	1	1	1	1	0	42	1	1	Liberia	Liberia	Mali	13	0	0	0	1	0	0	0									Liberia Mali	1		4	5	3	-2	1					0	0
C_042	1	2	1	1	1	1	1	1	55	1	1	Guinea	Guinea	Guinea	18	1	1	2	2	0	4	1									Guinea Senegal	1	2018	12	5	5	0					Be exposed No prophylactic treatment environmental	1	1			1	1
C_043	1	2	1	1	1	1	1	1	41	1	1	Guinea	Guinea	Guinea	15	1	1	2	2	0	4	1									Guinea	1	2015	4	5	5	0	1					0	1
C_044	1	2	2	0	1	2	1	1	60	1	1	Kenya	Kenya	Kenya	20	1	1	3	2	0	5	1									Kenya	0	2008	8	5	5	0	1					0	1				1
C_045	1	2	2	1	1	1	1			1	1	Cameroon				0	0	0	1	0											Cameroon	1		4	5	5	0	1				Bushes around homes lack of mosquito nets no prophylaxis against the disease	0	1			1	1
C_046	1	2	2	1	1	1	1	1	35	1	1	Cameroon	Cameroon	Cameroon	2	0	0	0	1	0	4	1									Cameroon	1			5	5	0	1				Bushes around homes lack of treated mosquito nets lack of prophylaxis	0	1				1
C_048	1	2	1	1	1	1	1	1	63	1	1	Guinea	Guinea	Guinea	14	1	1	1	1	0	4	1									Guinea Liberia	1		8	5	4	-1	1					0	1	1
C_049	1	2	1	1	1	1	1	1	42	1	1	Guinea	Guinea	Guinea	19	0	0	0	1	0	3	1									Guinea Mali	1		8	5	5	0	1					0	1
C_050	1	2	1	1	1	1	1	1	50	1	1	Guinea	Guinea	Guinea	20	1	1	3	2	0	4	1									Guinea Mali	1	2015	16	4	4	0					Mustic		1
C_051	1	2	1	1	1	1	1	0	32	1	1	Guinea	Guinea	Guinea	11	1	1	5	3	1	2	0									Guinea	1	2017	6	5	5	0	1					0	1
C_052	1	2	1	1	1	1	1	0	55	1	1	Guinea	Guinea	Guinea	15	1	1	3	2	0	4	1									Senegal Guinea	1	2018	4	5	5	0	1					0	1		1		1
C_053	1	2	1	1	1	1	1	1	55	1	1	Senegal	Guinea	Senegal	20	1	1	5	3	1	4	1									Guinea Senegal	1	2018	6	3	5	2	1					0	1		1		1
C_054	1	2	1	1	1	1	1	0	38	1	1	Liberia	Liberia	Liberia	18	1	1	1	1	0	0	0									Liberia	1	2014	8	5	5	0	1					0	1
C_055	1	2	1	1	1	1	1	0		1	1	Sierra Leone	Sierra Leone	Sierra Leone		1	1	5	3	1	4	1									Sierra Leone	1	2017	3	5	5	0	1					0	1
C_056	1	2	1	1	1	1	1	0	39	1	1	Togo	Togo	Guinea	16	1	1	2	2	0	4	1									Togo	1	2016	4	5	5	0	1					0	1				1
C_057	1	2	1	1	1	1	1	0	36	1	1	Liberia	Liberia	Liberia	19	1	1	4	2	0	4	1									Liberia	1	2017	2	5	5	0	1					0	1			1	1
C_058	1	2	1	1	1	1	1	0	33	1	1	Liberia	Liberia	Liberia	11	1	1	1	1	0	5	1									Liberia	1	2015	2	4	5	1	1					0	1					1
C_059	1	2	1	1	1	1	1	0	57	1	1	Sierra Leone	Sierra Leone	Sierra Leone	18	1	1	1	1	0	3	1									Sierra Leone	1	2011		5	5	0	1					0	1				1
C_061	1	2	1	1	1	1	1			1	1	Liberia				1	1														Liberia	1		4	4	5	1	1					0	1
C_062	1	2	1	1	1	1	1	0		1	1	Guinea	Guinea	Guinea		1	1				0	0									Guinea	1	2015	4	5	5	0	1					0	1
C_063	1	2	1	1	1	1	1	0	49	1	1	Ivory Coast	Ivory Coast	Ivory Coast		1	1				0	0									Ivory Coast	1	2017	8	5	5	0	1					0	1
C_064	1	2	1	1	1	1	1	0	51	1	1	Sierra Leone	Sierra Leone	Sierra Leone	18	1	1	2	2	0	4	1									Sierra Leone	1	2017	4	5	5	0	1					0	1			1	1
C_065	1	2	1	1	1	1	1	0	67	1	1	Togo	Togo	Togo	17	1	1	3	2	0	2	0									Togo	1	2014	10	1	4	3	1					0	1
C_066	1	2	1	1	1	1	1			1	1	Togo				1	1														Togo	1	2018	24	5	5	0	1					0	1
C_067	1	2	1	1	1	1	1	0	41	1	1	Togo	Togo	Togo	17	1	1	3	2	0											Togo	1	2016	5	3
C_068	1	2	1	1	1	1	1	1	43	1	1	Togo	Togo	Togo	15	1	1	3	2	0	3	1									Togo	1	2011	4	1	5	4	1					0	1				1
C_069	1	2	1	1	1	1	1	1	34	1	1	Togo	Togo	Togo	11	1	1	1	1	0	3	1									Togo	1	2011	8	4	5	1	1					0	1
C_070	1	2	1	1	1	1	1	1		1	1	Togo	Togo	Togo	10	1	1	1	1	0	5	1									Togo	1	2015	4	4	5	1	1					0	1			1
C_071	1	2	1	1	1	1	1	0		1	0	United States	Togo	Togo		1	1	1	1	0	4	1									Togo	1	2009
C_072	1	2	1	1	1	1	1	0	36	1	1	Togo	Togo	Togo		1	1	5	3	1	5	1									Togo Benin Ghana	1		4	5	5	0							1
C_073	1	2	1	1	1	1	1	1		1	1	Togo				1	1	2	2	0											Togo	1	2016		4	4	0							1
C_074	1	2	1	1	1	1	1	0		1	1	Togo	Togo	Togo	10	1	1	2	2	0	2	0									Togo	1	2014		5	5	0							1				1
C_075	1	2	1	1	1	1	1	1	35	1	1	Togo	Togo	Togo	13	1	1	3	2	0	5	1									Togo	1	2017	3	1	5	4							1
C_076	1	2	1	1	1	1	1	0	34	1	1	Guinea	Guinea	Guinea		1	1	4	2	0	5	1									Guinea	1	2018	6	2	5	3	1					0	1
C_078	1	2	1	1	1	1	1	0	50	1	1	Togo	Togo	Togo		1	1				1	0									Togo	1	2017	7	5	5	0	1					0	1			1
C_079	1	2	1	1	1	1	1	0	50	1	1	Togo	Togo	Togo		1	1	1	1	0	3	1									Togo	1	2012	5	4	5	1	1					0	1
C_080	1	2	1	1	1	1	1	1	45	1	0	United States	Togo	Togo	18	0	0	0	1	0	4	1									Togo	1		3	4	5	1	1					0	1
C_081	1	2	1	1	1	1	1	0	42	1	1	Mauritania	Benin	Togo	19	1	1	2	2	0	5	1									Togo	1	2015	3	4	5	1	1					0	1		1	1	1
C_082	1	2	1	1	1	1	1	0	47	1	1	Mauritania	Benin	Togo	17	0	0	0	1	0											Togo	1		2
C_083	1	2	1	1	1	1	1	0	45	1	1	Togo	Ivory Coast	Togo	19	1	1	5	3	1	5	1									Togo	1	2017	2	4	4	0	1					0	1
C_085	1	2	1	1	1	1	1	1	40	1	1	Mauritania	Togo	Togo	16	1	1	1	1	0	5	1									Togo Senegal Mauritania	1	2015	3	5	5	0	1					0	1				1
C_086	1	2	1	1	1	1	1	1		1	1	Togo	Togo	Togo	15	1	1	5	3	1	5	1									Ghana Togo	1	2016	3	4	5	1	1					0	1	1		1	1
C_087	1	2	1	1	1	1	1	1	48	1	1	Togo	Togo	Togo	2	0	0	0	1	0	3	1									Togo	1		4	4	5	1	1					0	1				1
C_088	1	2	1	1	1	1	1	1	53	1	1	Togo	Togo	Togo	15	1	1	5	3	1	3	1									Togo	1	2017	3	5	5	0	1					0	1				1
C_089	1	2	1	1	1	1	1	1	51	1	1	Cameroon	Cameroon	Cameroon	18	1	1	3	2	0	4	1									Cameroon	1	2018	3	5	5	0	1					0	1
C_090	1	2	1	1	1	1	1	0	34	1	1	Togo	Togo	Togo	8	1	1	2	2	0	4	1									Togo	1	2013	4	4	5	1	1					0	1
C_091	1	2	1	1	1	1	1			1	1	Ghana				1	1														Togo Ghana Burkina Faso Benin	1	2012	12	5	5	0	1				blood transfusion	0	1					1
C_092	1	2	1	1	1	1	1	1	44	1	1	Togo	Togo	Togo	13	1	1	5	3	1	3	1									Togo	1	2018	4	1	5	4	1					0	1			1
C_093	1	2	1	1	1	1	1	1	48	1	1	Togo	Togo	Togo	15	1	1				3	1									Togo	1	2018	8	5	5	0	1					0	1				1
C_094	1	2	1	1	1	1	1	0	42	1	1	Togo	Togo	Ghana	13	1	1	4	2	0	3	1									Togo	1	2017	3	4	5	1	1					0	1	1		1
C_095	1	2	1	1	1	1	1	0	46	1	1	Togo	Togo	Togo	20	1	1	5	3	1	3	1									Togo	1	2018	2	5	5	0					living environment	1	1				1
C_096	1	2	1	1	1	1	1	1	44	1	1	Togo	Togo	Togo	20	1	1	5	3	1	4	1									Togo	1	2018	8	4	4	0	1					0	1				1
C_097	1	2	1	1	1	1	1	1	46	1	1	Togo	Togo	Togo	20	1	1	5	3	1	5	1									Togo	1	2011	4	3	5	2	1					0	1				1
C_098	1	2	1	1	1	1	1	1		1	1	Togo	Togo	Togo		1	1	4	2	0	4	1									Togo	1	2015	3	4	5	1	1					0	1
C_100	1	2	1	0	1	2	1		58	1	1	Somalia	Somalia	Somalia	2	0	0	0	1	0	0	0									Kenya	0			4	5	1	1					0	1			1
C_101	1	2	2	1	1	1	1			1	1	Togo				1	1														Togo	1	2018	1	5	5	0	1				Mainly Malaria parasite is transmited to human through mosquito bite One can also contract malaria though blood transfusison There is also maternal trasmission where a mother can trasmit malaria to the fetus before birth	0	1		1	1
C_102	1	2	1	1	1	1	1	1	58	1	1	Sierra Leone	Sierra Leone	Liberia	18	1	1	2	2	0	5	1									Sierra Leone	1	2018	2	5	5	0	1					0	1	1		1
C_103	1	2	1	1	1	1	1	0	55	1	1	Liberia	Liberia	Liberia	20	1	1	2	2	0	5	1									Liberia Ghana Sierra Leone	1	2016	2	5	5	0	1					0	1	1		1
C_104	1	2	1	1	1	1	1	1	39	1	1	Liberia	Liberia	Liberia	15	1	1	3	2	0	3	1									Liberia	1	2017	3	5	5	0	1					0	1
C_105	1	2	1	1	1	1	1	1	43	1	1	Liberia	Liberia	Liberia	13	1	1	2	2	0	3	1									Liberia Ghana	1	2016	3	5	5	0	1					0	1		1
C_107	1	2	1	1	1	1	1	0	48	1	1	Nigeria	Nigeria	Nigeria	23	1	1	5	3	1	3	1									Nigeria	1	2017	4	4	5	1	1					0	1
C_108	1	2	1	1	1	1	1	1	48	1	1	Liberia	Liberia	Liberia		1	1	1	1	0	3	1									Liberia	1	2018	3	5	5	0	1					0	1			1	1
C_109	1	2	1	1	1	1	1	0	71	1	1	Liberia	Liberia	Liberia	23	1	1	4	2	0	4	1									Liberia	1	2017	8	5	5	0	1					0	1		1	1
C_110	1	2	1	1	1	1	1	1	34	1	1	ghana			13	1	1	5	3	1	4	1									Ghana	1	2018	3	4	5	1	1					0	1			1
C_111	1	2	1	1	1	1	1	1	60	1	1	Ghana	Ghana	Ghana	30	1	1	5	3	1	5	1									Ghana	1	2017	2	4	5	1	1					0	1				1
C_112	1	2	1	1	1	1	1	0	32	1	1	Nigeria	Nigeria	Nigeria	1.5	1	1	1	1	0	5	1									Nigeria	1	2017	3	1	5	4	1					0	1
C_113	1	2	1	1	1	1	1	0	31	1	1	Togo	Togo	Togo	7	0	0	0	1	0	5	1									Togo	1		3	4	5	1	1				mosquito bite blood transfusion maternal transmission to fetus	0	1					1
C_114	1	2	1	1	1	1	1	1	34	1	1	Togo	Togo	Togo	12	1	1	2	2	0	5	1									Togo	1	2018	1	2	5	3	1					0	1
C_115	1	2	1	0	1	2	1	0	30	1	1	Somalia	Somalia	Somalia	26	1	1	3	2	0	4	1									Kenya	0	2010	12	4	5	1	1					0	1
C_116	1	2	1	1	1	1	1	1	28	1	1	Sierra Leone	Senegal	Senegal	7	0	0	0	1	0	2	0									Senegal	1		4	1	1	0	1					0	1			1	1
C_118	1	2	1	1	1	1	1	1		1	1	Sierra Leone			7	1	1	1	1	0	2	0									Guinea Sierra Leone	1	2011	3	5	5	0	1					0	1	1		1
C_119	1	2	1	1	1	1	1	1	23	1	0	United States	Sierra Leone	Gambia		0	0	0	1	0	4	1									Guinea Togo Sierra Leone	1		4	4	5	1	1				Needles and mosquitoes	0	1
C_120	1	2	1	1	1	1	1	0	28	1	1	Nigeria	Nigeria		20	1	1	2	2	0	4	1									Nigeria Ghana	1	2016	12	5	4	-1	1					0	1
C_121	1	2	1	1	1	1	1	0	30	1	1	Guinea	Guinea	Guinea	10	0	0	0	1	0	0	0									Guinea	1		2	5	5	0	1				Mosquitos poor sanitation	1	0
C_122	1	2	1	1	1	1	1	0	27	1	0	United States	Ghana	Ghana		1	1	5	3	1	3	1									Ghana Liberia Nigeria South Africa	1	2013	22	3	3	0	1				Mosquito bites blood transfusion sharing of needles	0	0
C_124	1	2	1	1	1	1	1	1	35	1	0	United States	Sierra Leone	Sierra Leone		1	1	1	1	0	2	0									Sierra Leone	1		4	5	5	0					Poor health conditions	1	0
C_125	1	2	1	1	1	1	1	0		1	0	United States	Liberia	Liberia		1	1	1	1	0	3	1									Liberia	1	2013	1	5	5	0	1					0	1
C_126	1	2	1	1	1	1	1			1	1	Liberia				0	0	0	1	0											Ghana Liberia	1		1	4	5	1	1					0	1
C_127	1	2	1	1	1	1	1	0	43	1	1	Liberia	Liberia	Liberia		1	1	1	1	0	3	1									Liberia	1	2009	2	5	5	0	1					0	1	1
C_128	1	2	1	1	1	1	1	1	39	1	1	Liberia	Liberia	Liberia	14	1	1	1	1	0	0	0									Liberia	1	2018	3	5	5	0	1				mosquito bite exposure to high sun rays	1	1		1		1
C_130	1	2	1	1	1	1	1	0		1	1	Liberia	Liberia	Liberia	10	1	1	4	2	0	4	1									Liberia	1	2015	4	4	5	1	1				mosquito bite no bed error nets avoid keeping still water around house	0	1
C_132	1	2	1	1	1	1	1	0		1	1	Liberia	Liberia	Liberia	20	1	1	5	3	1	3	1									Liberia	1	2018	4	1	5	4	1					0	1
C_133	1	2	1	1	1	1	1	0	50	1	1	Nigeria	Nigeria	Nigeria	17	1	1	4	2	0	5	1									Nigeria	1	2017	2	3	5	2	1					0	1			1
C_135	1	2	1	1	1	1	1	0	24	1	0	United States	Nigeria	Nigeria		1	1	2	2	0	4	1									Nigeria	1	2010	2	4	5	1	1			1	From other people's bodily fluids mosquito bites	1	1	1			1
C_136	1	2	1	0	1	2	1	1	33	1	1	South Africa	Somalia	Somalia	7	1	1	2	2	0	3	1									South Africa	0	2018	12	4	5	1		1				1	1
C_137	1	2	1	1	1	1	1	1	72	1	1	Nigeria	Nigeria	Nigeria		1	1	1	1	0	4	1									Nigeria	1	2018		3	5	2	1					0	0
C_138	1	2	1	1	1	1	1	1	55	1	1	Nigeria	Nigeria	Nigeria	30	1	1	5	3	1	4	1									Nigeria	1	2018	2	3	3	0	1					0	1
C_139	1	2	1	1	1	1	1	0	55	1	1	Cameroon	Cameroon	Cameroon	12	1	1	2	2	0	5	1									Cameroon Nigeria Kenya	1	2018	4	5	5	0	1					0	1			1
C_140	1	2	1	1	1	1	1	0	30	1	1	Cameroon	Cameroon	Cameroon	7	1	1	1	1	0	5	1									Cameroon	1	2015	8	5	5	0	1					0	1
C_141	1	2	1	0	1	2	1	1	23	1	1	Ethiopia	Ethiopia	Ethiopia	16	1	1	2	2	0	2	0									Ethiopia	0	2018	10	3	5	2	1					0	1				1
C_142	1	2	1	1	1	1	1	0	40	1	1	Cameroon	Cameroon	Cameroon	14	1	1	2	2	0	5	1									Cameroon	1	2014	4	5	5	0	1					0	1	1		1	1
C_143	1	2	1	1	1	1	1	1	25	1	1	Cameroon	Cameroon	Cameroon		1	1	1	1	0	4	1									Cameroon	1	2017	2	5	5	0	1					0	1			1
C_145	1	2	1	1	1	1	1	1	35	1	1	Ghana	Ghana	Ghana	20	1	1	1	1	0	4	1									Ghana	1	2016	3	3	4	1	1					0	1
C_146	1	2	1	1	1	1	1	1	65	1	1	West Africa	West Africa	West Africa	40	1	1	5	3	1	4	1									West Africa	1		12	3	4	1	1					0	1	1
C_147	1	2	1	1	1	1	1	1	65	1	1	Nigeria	Nigeria	Nigeria	20	1	1	5	3	1	5	1									Nigeria	1		6	5	5	0	1					0	1				1
C_148	1	2	1	1	1	1	1	0	64	1	1	Nigeria	Nigeria	Nigeria	17	1	1	5	3	1	5	1									Nigeria	1	2018	8	5	5	0	1					0	1		1	1	1
C_149	1	2	1	0	1	2	1	1	35	1	1	Somalia	Somalia	Somalia	5	1	1	3	2	0	3	1									Uganda Kenya	0	2018	8	1	5	4	1					0	1			1	1
C_150	1	2	1	1	1	1	1	1		1	1	Nigeria	Nigeria	Nigeria	16	1	1	3	2	0	3	1									Nigeria Ghana	1	2016	3	5	5	0	1					0	1	1		1
C_151	1	2	1	1	1	1	1	0		1	1	Ghana	Ghana	Nigeria	16	1	1	5	3	1	3	1									Ghana	1	2018	4	5	5	0							1		1	1
C_153	1	2	1	1	1	1	1	0	40	1	1	Cameroon	Cameroon	Cameroon	8	1	1	1	1	0	1	0									Cameroon	1	2016	2	5	5	0	1				Mosquito bites living in trash	1	1
C_154	1	2	1	1	1	1	1	1	52	1	1	Nigeria	Nigeria	Nigeria	10	1	1	5	3	1	5	1									Nigeria	1	2017	3	4	5	1	1					0	1				1
C_155	1	2	1	1	1	1	1	1	64	1	1	Cameroon	Cameroon	Cameroon	30	1	1	3	2	0	5	1									Cameroon	1	2014	4	5	5	0	1				Dirty standing water breeding place is mosquitos	0	1
C_156	1	2	1	1	1	1	1	0	22	1	0	United States	Nigeria	Nigeria		1	1	1	1	0	3	1									Nigeria	1	2016	8	5	5	0	1					0	1					1
C_157	1	2	1	0	1	2	1	0	25	1	1	Uganda	Uganda	Uganda	11	1	1	1	1	0	4	1									Kenya	0	2017	3	3	5	2	1					0	1					1
C_159	1	2	1	1	1	1	1	0	35	1	1	Nigeria	Nigeria	Nigeria	5	0	0	0	1	0	4	1									Nigeria	1		3	5	5	0	1					0	0
C_160	1	2	1	1	1	1	1	0	51	1	1	Nigeria	Nigeria	Nigeria	18	1	1	2	2	0	4	1									Nigeria	1	2012	2	5	3	-2	1					0	1					1
C_161	1	2	1	1	1	1	1	0	32	1	1	Ghana	Ghana	Ghana	7	0	0	0	1	0	4	1									Ghana	1		4	5	5	0	1				mosquitoes not using nets stagnant water	0	1
C_162	1	2	1	1	1	1	1	1	23	1	1	Nigeria	Nigeria	Nigeria	18	0	0	0	1	0	3	1									Nigeria	1		2	3	3	0	1					0	1	1
C_163	1	2	1	1	1	1	1	0	40	1	1	Nigeria	Nigeria	Nigeria	15	1	1	2	2	0	5	1									Nigeria	1	2009	4	4	5	1	1					0	1					1
C_164	1	2	1	1	1	1	1	1	48	1	1	Nigeria	Nigeria	Nigeria	15	1	1	5	3	1	5	1									Nigeria	1	2017	2	5	5	0	1					0	1				1
C_165	1	2	1	1	1	1	1	0	40	1	1	Nigeria	Nigeria	Nigeria	7	1	1	1	1	0	5	1									Nigeria	1	2011	20	5	5	0	1					0	1			1
C_166	1	2	1	1	1	1	1	1	38	1	1	Nigeria	Nigeria	Nigeria	4	1	1	3	2	0	4	1									Nigeria	1	2018	4	3	3	0	1					0	1
C_167	1	2	1	1	1	1	1	0	34	1	1	Nigeria	Nigeria	Nigeria	15	0	0	0	1	0	5	1									Nigeria	1		5	4	5	1	1					0	1		1
E_001	1	2	3	0	1	2	1	1	51	1	1	Sudan	Sudan	Sudan	17	1	1	2	2	0	2	0	0				African	1	1		Sudan	0	2017	16	5	5	0	1					0	1	1			1
E_002	1	2	3	0	1	2	1	0	32	1	1	Ethiopia	Ethiopia	Ethiopia	19	1	1	5	3	1	2	0	0				Ethiopian	1	1		Ethiopia	0	2017	5	2	5	3	1					0	0
E_003	1	2	3	0	1	2	1	0	41	1	1	Sudan	Sudan	Sudan	13	1	1	2	2	0	2	0	0				Black	1	0		Sudan	0	2016	3	1	5	4					Rain people get sick during the wet season	1	1
E_004	1	2	3	0	1	2	1	0	23	1	1	Somalia	Somalia	Somalia	4	0	0	0	1	0	3	1	0				Somali	1	1		Somalia	0		24	3	5	2					Dirty living conditions	1	1	1
E_005	1	2	3	0	1	2	1	1	38	1	1	Somalia	Somalia	Somalia	3	1	1	1	1	0	2	0	1	Ethiopia Kenya South Africa	2014	18	Somali Black	1	1		Ethiopia	0	2014	4	4	5	1	1	1				1	1	1	1
E_006	1	2	3	0	1	2	1	1	39	1	1	Ethiopia	Ethiopia	Ethiopia	5	0	0	0	1	0	1	0	1	South Africa	2002	9	Black	1	0		Ethiopia Djibouti	0		8	5	5	0	1					0	1	1
E_007	1	2	3	0	1	2	1	0	30	1	1	Somalia	Somalia	Somalia	18	1	1	2	2	0	2	0	0				Somalian	0			Somalia	0	2014	12	1	4	3	1					0	1	1	1
E_008	1	2	3	0	1	2	1	0	60	1	1	Somalia	Somalia	Somalia	10	1	1	1	1	0	0	0	0				Somalian	1			Somalia	0	2012	12	2	4	2	1					0	1			1
E_009	1	2	3	0	1	2	1	0	24	1	1	Kenya	Kenya	Kenya	7	1	1	1	1	0	3	1	0				African	0		Contracted malaria while traveling abroad	Kenya	0	2013	4	4	5	1	1					0	1			1
E_012	1	2	3	0	1	2	1	1		1	1	Ethiopia	Ethiopia	Ethiopia		1	1	1	1	0	0	0	1	Somalia Djibouti Saudi Arabia Qatar Germany Yemen	1998		African	1	0		Ethiopia	0	2017	4	3	5	2	1					0	1			1	1
E_013	1	2	3	0	1	2	1	1	39	1	1	Ethiopia	Ethiopia	Ethiopia	18	1	1	2	2	0	2	0	0				African	0			Ethiopia	0		12	2	3	1				1		1	1				1
E_014	1	2	3	0	1	2	1	0	24	1	1	Kenya	Somalia	Somalia	10	0	0	0	1	0	2	0	0				Black African	1	2		Ethiopia	0			2	5	3	1					0	1	1
E_015	1	2	3	0	1	2	1	0	60	1	1	Somalia	Somalia	Somalia	17	1	1	5	3	1	0	0	0				Somali	1			Somalia Ethiopia	0	2013	16	3	4	1	1					0	1	1
E_016	1	2	3	1	1	1	1	0	63	1	1	Nigeria	Nigeria	Nigeria	19	1	1	2	2	0	3	1	0				Nigerian	1	2		Nigeria	1	2013	2	5	5	0	1				Breatfeeding	0	1		1		1
E_017	1	2	3	1	1	1	1	0	62	1	1	Liberia	Liberia	Liberia	23	1	1	5	3	1	3	1	0				Liberian	1	2		Liberia	1	2017	38	4	5	1	1	1	1		Other contaminations	1	1	1
E_019	1	2	3	0	1	2	1	1	47	1	1	Somalia	Somalia	Somalia	11	1	1	1	1	0	2	0	0				Somali	1	0	Hold seminars to educate people	Ethiopia	0	2010	8	4	4	0	1					0	1	1		1
E_020	1	2	3	0	1	2	1	1	31	1	1	Somalia	Somalia	Somalia	4	1	1	1	1	0	2	0	0				African	1	1		Somalia	0	2009	4	5	5	0	1					0	1			1
E_021	1	2	3	1	1	1	1	1	72	1	1	Cameroon	Cameroon	Cameroon	0.25	0	0	0	1	0	1	0	0				African Black	1	1		Cameroon	1		16	5	5	0	1					0	1			1
E_022	1	2	3	1	1	1	1	1	37	1	1	Nigeria			14	1	1	5	3	1	5	1	0					1	0	To allow people to seek help for malaria treatment the fear and stigma should be eliminated	Nigeria	1	2017	2	1	3	2	1					0	1	1
E_023	1	2	3	1	1	1	1	0	49	1	1	Togo	Togo	Togo	17	1	1	5	3	1	4	1	0				African	1	1		Togo	1	2014	4	3	5	2					Doesn't Know	1	1				1
E_024	1	2	3	0	1	2	1	1	76	1	1	Kenya	Kenya	Kenya	16	1	1	1	1	0	4	1	0				African	1	1		Kenya	0	2015	3	1	5	4	1					0	1				1	1
E_027	1	2	3	0	1	2	1	1	20	1	1	Kenya	Somalia	Somalia	16	1	1	1	1	0	2	0	0					0			Somalia	0	2014	52	3	4	1	1					0	1	1	1	1
E_028	1	2	3	1	1	1	1	1	41	1	1	Nigeria	Nigeria	Nigeria	12	1	1	1	1	0	3	1	0				African	0			Nigeria	1	2014	2	2	5	3	1					0	1		1	1
E_029	1	2	3	0	1	2	1	1	50	1	1	Kenya	Ethiopia	Ethiopia	20	1	1	4	2	0	4	1	1	Kenya	1996	5	African	0			Kenya	0	2016	4	1	5	4	1					0	1				1
E_030	1	2	3	1	1	1	1	1	47	1	1	Togo	Togo	Togo	13	1	1	3	2	0	4	1	0				African	1	0		Togo	1	2016	2	4	4	0	1					0	1			1	1
E_031	1	2	3	0	1	2	1	1	47	1	1	Somalia	Somalia	Somalia	10	1	1	1	1	0	2	0	0				African	1			Ethiopia	0	2011	12	1	4	3	1					0	1	1		1
E_032	1	2	3	1	1	1	1	1	53	1	1	Senegal	Guinea	Guinea	14	1	1	5	3	1	1	0	0				African	1			Senegal	1	2016		3	5	2	1					0	1	1		1
E_033	1	2	3	0	1	2	1	1	40	1	1	Somalia	Somalia	Somalia	10	1	1	1	1	0	2	0	0					1	3		Somalia	0	2016	4	4	4	0	1					0	1	1		1
E_034	1	2	3	0	1	2	1	0	45	1	1	Somalia	Somalia	Somalia	18	1	1	1	1	0	2	0	0				Muslim	1	1		Kenya	0	2009	4	3	5	2	1	1				1	1				1
E_035	1	2	3	0	1	2	1	1	24	1	1	Kenya	Kenya	Somalia	1	1	1	4	2	0	3	1	0				Somali	0			Somalia	0	2015	12	2	5	3		1				1	0
E_036	1	2	3	0	1	2	1	0	37	1	1	Somalia	Somalia	Somalia	18	1	1	2	2	0	0	0	1	Kenya	2000	10	Black American	1	0		Kenya	0	2017	3	1	5	4	1					0	1		1	1
E_037	1	2	3	0	1	2	1	1	31	1	1	Kenya	Somalia	Somalia	12	1	1	1	1	0	2	0	0				Somali	1	4		Kenya	0	2008	12	4	4	0	1					0	1	1	1	1
E_038	1	2	3	0	1	2	1	1	70	1	1	Somalia	Somalia	Somalia	15	1	1	2	2	0	2	0	0				Black	1	1		Somalia	0	2015	4	4	4	0	1					0	1	1	1	1
E_039	1	2	3	0	1	2	1	1	50	1	1	Somalia	Somalia	Somalia	11	0	0	0	1	0	3	1	1	Kenya	1994	4	African American	1	0	Patient indicated that he will try to take his anti malarial medication but "might forget" to do so	Kenya	0		0.3	3	4	1	1					0	1	1
E_040	1	2	3	0	1	2	1	1	51	1	1	Somalia	Somalia	Somalia	16	1	1	2	2	0	2	0	1	Kenya Ethiopia	2000	10	Somali	1	1		Somalia Ethiopia	0	2011	12	5	5	0			1			1	1				1
E_041	1	2	3	0	1	2	1	1	57	1	1	Somalia	Somalia	Somalia	33	1	1	3	2	0	2	0	0				Somalian	1	0		Somalia	0	2012	12	1	3	2					Don't know	1	0
E_042	1	2	3	0	1	2	1	1	42	1	1	Sudan	Sudan	Sudan	4	0	0	0	1	0	4	1	1	UAE	2011	11	African	1		Did not know how malaria is treated in the US and is concerned that he would be quarantined Pt also did not know that there were prophylactic medications when answering question #25 until interviewer informed him of its existence he then answered that he would take such medication now that he knew it existed	Sudan	0		8	5	5	0	1					0	1		1	1		1
E_043	1	2	3	0	1	2	1	0	47	1	1	Somalia	Somalia	Somalia	25	1	1	1	1	0	4	1	1	Kenya	1990	4	Black African	1	0	Can prepare all they want but ultimately medication is necessary Patient also indicated that if given daily and weekly medication options the daily would be more effective because they would remember it more	Kenya	0	2017	3	5	5	0	1					0	1	1	1	1	1
E_044	1	2	3	0	1	2	1	0	25	1	1	Kenya	Somalia	Somalia	13	1	1	1	1	0	2	0	0				African American	1			Kenya	0	2011	8	4	5	1	1					0	1	1
E_045	1	2	3	0	1	2	1	1	49	1	1	Somalia	Ethiopia	Ethiopia	18.5	1	1	5	3	1	1	0	1	Kenya	2000	10	African	1	2		Somalia	0	2017	40	5	5	0	1					0	1			1	1
E_046	1	2	3	0	1	2	1	0	42	1	1	Somalia	Somalia	Somalia	11	1	1	1	1	0	1	0	1	Kenya	2005	8	Black African American	1	0		Kenya	0	2015	12	3	1	-2	1		1		"Where you traveling has malaria"	1	1		1		1
E_047	1	2	3	0	1	2	1	0	36	1	1	Somalia	Somalia	Somalia	22	1	1	2	2	0	2	0	1	Kenya	1996	4	Black	1	4		Kenya	0	2010	3	4	5	1	1					0	1	1
E_048	1	2	3	0	1	2	1	0	34	1	1	Ethiopia	Ethiopia	Ethiopia	17	1	1	5	3	1	3	1	1	Kenya	2001	3	Oromo	1	2		Ethiopia	0		0.8	5	5	0	1					0	1	1
E_049	1	2	3	0	1	2	1	0	73	1	1	Uganda	Uganda	Uganda	15	1	1	1	1	0	0	0	0				African	1	0		Uganda	0	2015	4	5	5	0	1	1			Lack of care self	1	1
E_050	1	2	3	0	1	2	1	0	36	1	1	Ethiopia	Ethiopia	Ethiopia	18	1	1	5	3	1	3	1	0				Black African American	1	2		Ethiopia	0	2015	12	1	5	4	1	1				1	1				1
E_051	1	2	3	0	1	2	1	1	55	1	1	Somalia	Somalia	Somalia	20	0	0	0	1	0	5	1	0				Somali American	1	1	Malaria is very important to educate people on patient lost eldest brother but just didn't have access to malaria medication in the camp so was unable to be treated successfully The people who are most affected are the "bread basket" of Africa if we don't care for them how will much of Africa feed their population	Somalia	0		12	3	5	2	1					0	1				1
E_052	1	2	3	0	1	2	1	0	74	1	1	Ethiopia	Ethiopia	Ethiopia	4	1	1	2	2	0	0	0	0				Ethiopian	1	0		Ethiopia	0	2016	52	5	3	-2		1				1	1
E_053	1	2	3	0	1	2	1	1	40	1	1	Ethiopia	Ethiopia			1	1	3	2	0	2	0	1	Ethiopia Somalia Kenya	1999	5	Black	1	2		Somalia	0	2016	8	5	5	0	1					0	1			1	1
E_054	1	2	3	0	1	2	1	1	51	1	1	Somalia	Somalia	Somalia	18	1	1	4	2	0	3	1	1	Angola	1997	1	Black	1	3		Somalia	0	2015	4	3	3	0	1					0	0
E_055	1	2	3	0	1	2	1	0	20	1	1	Kenya	Somalia	Somalia	11	0	0	0	1	0	3	1	0				Somali Somali African	0			Kenya	0		8	1	5	4				1	Weather	1	1				1
E_056	1	2	3	1	1	1	1	0	63	1	1	Liberia	Liberia	Liberia	40	1	1	4	2	0	3	1	0					1	1		Liberia	1	2017	43	5	5	0	1					0	1				1
E_057	1	2	3	0	1	2	1	0	68	1	1	Somalia	Somalia	Somalia	12	1	1	2	2	0	0	0	1	Kenya	2006	2	Black	1			Somalia	0	2017	12	5	5	0	1					0	1				1
E_058	1	2	3	0	1	2	1	0	51	1	1	Somalia	Somalia	Somalia	16	0	0	0	1	0	3	1	1	Pakistan	2000	7	African	0			Somalia	0		4	3	5	2	1				Without medicine	0	1		1	1	1
E_059	1	2	3	1	1	1	1	0	32	1	1	Nigeria	Nigeria	Nigeria	5	1	1	1	1	0	3	1	0				Black African American	1	0		Nigeria	1	2014	3	1	1	0	1					0	1
E_060	1	2	3	0	1	2	1	1	34	1	1	Somalia	Somalia	Somalia	10	1	1	1	1	0	2	0	1	Kenya	2008	4	Black	1	0		Somalia	0	2017	3	1	5	4		1				1	0
E_061	1	2	3	0	1	2	1	0	27	1	1	Somalia	Somalia	Somalia	4.5	1	1	1	1	0	2	0	1	Kenya	2013	6	Somalian	1	0		Djibouti	0	2017	6	3	5	2	1					0	1	1	1	1	1
E_062	1	2	3	0	1	2	1	0	31	1	1	Somalia	Somalia	Somalia	19	0	0	0	1	0	2	0	0				Somali	1	0		Somalia	0		3	5	5	0				1	Germs	1	0
E_064	1	2	3	0	1	2	1	0	70	1	1	Ethiopia				1	1													Patient went to CT halfway through the survey but then refused to continue the survey or give any additional information after returning from the CT hence the incomplete answers that are included on this form	Ethiopia	0		8	1	5	4	1					0	1				1
E_066	1	2	3	1	1	1	1	1	32	1	1	Ivory Coast	France	France	3	1	1	5	3	1	5	1	0				Black	1	1		Ghana	1		1	3	5	2	1					0	1				1
E_067	1	2	3	0	1	2	1	1	71	1	1	Kenya	Kenya	Kenya	2	1	1	2	2	0	3	1	0				Kenyan	1	0		Kenya	0	2017	44.5	1	5	4	1					0	1		1	1
E_068	1	2	3	0	1	2	1	0	36	1	1	Somalia	Somalia	Somalia	18	1	1	1	1	0	3	1	1	Kenya	2018	7	African	0		Unsure if this would be considered a VFR traveller "trip" to Kenya that they are talking about lasted 7 years	Kenya	0	2018	52	2	4	2	1					0	1		1
E_070	1	2	3	1	1	1	1	1	59	1	1	Nigeria	Nigeria	Nigeria	35	1	1	5	3	1	4	1	0				Black	0			Nigeria	1	2018	3	5	5	0	1					0	1			1
E_071	1	2	3	0	1	2	1	0	49	1	1	Somalia	Somalia	Somalia	24	1	1	1	1	0	2	0	0				African	1	1		Kenya	0	2018	3	5	5	0	1	1				1	1	1	1	1	1
E_072	1	2	3	0	1	2	1	1	47	1	1	Somalia	Somalia	Somalia	21	1	1	1	1	0	2	0	1	Kenya	1977	1	Black	1	1		Somalia	0	2013	8	1	5	4	1	1	1			1	1	1	1	1	1
M_001	1	1	6	1	1	1	1	1	43	1	1	Liberia	Liberia	Liberia	18.5	1	1				4	1	1	Guinea		5	Black			Advice people travelling to malaria countries to take medications visit travel clinic If going during rainy season be more careful because chances of getting malaria increases	Guinea	1	2016	2	1	5	4	1					0	1
M_002	1	1	6	1	1	1	1	1	76	1	1	Liberia				1	1										Black or African American				Liberia	1	2016	72	5	5	0	1					0	1
M_003	1	1	6	1	1	3	0	1	52	1	1	Panama	Panama	Panama		1	1				4	1	0				Latino				Ghana	1	2016	4	1	5	4	1					0	1		1	1	1
M_004	1	1	6	1	1	1	1	1	41	1	1	Nigeria	Nigeria	Nigeria		1	1				4	1	0				Nigerian				Nigeria	1	2016	4	1	1	0	1					0	1			1	1
M_005	1	1	6	0	1	3	0	1	46	1	1					1	1						0				African American				Kenya	0	2016	1.57	2	5	3	1					0	1		1
M_006	1	1	6	0	1	2	1	1	62	1	1	Somalia	Somalia	Somalia		1	1				0	0	0				African				Kenya	0	2016	26	1	5	4	1					0	1	1	1	1	1
M_007	1	1	6	0	1	3	0	1	70	1	0	United States	United States	United States		1	1				2	0	0				White				Uganda	0	2016	2	3	5	2	1					0	1				1
M_008	1	1	6	1	1	3	0	1	28	1	0	United States	United States	United States		1	1				4	1	0				Caucasian				Ghana	1	2016	2.5	4	3	-1	1				Blood	0	1	1			1	1
M_009	1	1	6	1	1	1	1	1	21	1	1	Ivory Coast	Ivory Coast	Ivory Coast		1	1				3	1	1	Gabon			Black African				Togo Ivory Coast	1	2016		5	5	0	1					0	1				1
M_010	1	1	6	0	1	2	1	1	58	1	1	Sudan	Sudan	Sudan		1	1				2	0	1	Saudi Arabia			African				Sudan	0	2016		5	5	0					River farms grass rainy season	1	0
M_011	1	1	6	1	1	1	1	1	22	1	1	Indonesia	Nigeria	Nigeria	11	1	1				2	0	1	Congo Nigeria			African			I had good knowledge about it; there is little to no awareness to disease around here in Minnesota friends did not realize it was a big deal	Nigeria	1	2016	3	2	4	2	1					0	0
M_012	1	1	6	1	0	1	1	0	30	1	1	Liberia				1	1														Liberia	1	2016	4	1	3	2	1	1			Street food	1	1	1
M_013	1	1	6	1	1	1	1	1	44	1	1	Cameroon	Cameroon	Cameroon	4	1	1				3	1	0				Black or African American				Cameroon	1	2016	3	1	4	3	1					0	1			1
M_014	1	1	6	0	1	2	1	1	9	0	1	Eritrea	Eritrea	Eritrea	0.5	1	1				0	0	1	Ethiopia			Black or African American				Eritrea Ethopia	0	2016	12	5	1	-4	1					0	0
M_015	1	1	6	1	1	1	1	0	70	1	1	Liberia	Liberia	Liberia		1	1				2	0	0	Liberia	1995	51	Black				Liberia	1	2016	12	1	5	4	1					0	1				1
M_016	1	1	6	1	1	1	1	1	37	1	1	Togo	Togo	Togo	14	1	1				3	1	0	Togo			Black				Togo	1	2016	3	1	4	3	1				Not taking anti malarias not using bed nets	0	1	1	1		1
M_017	1	1	6	1	1	1	1	0	57	1	1	Nigeria	Nigeria	Nigeria	1	1	1				2	0	0	Nigeria			Black				Nigeria	1	2016	4	1	5	4		1			Dirty environment unclean food	1	1
M_018	1	1	6	1	1	1	1	1	64	1	1	Sierra Leone	Sierra Leone	Sierra Leone		1	1				5	1					African				Sierra Leone	1	2016	8	4	2	-2	1					0	1		1	1	1
M_019	1	1	6	1	1	1	1	1	32	1	1	Liberia	Liberia	Liberia	20	1	1				2	0	0	Liberia			Black African American			My advise is to make sure you do everything to prevent malaria before travelling to country that has malaria It is easy to prevent malaria than to treat it	Liberia Ghana	1	2016	3	1	1	0	1					0		1	1	1	1
M_020	1	1	6	1	1	1	1	0	63	1	1	Liberia	Liberia	Liberia	0.35	1	1				2	0	1	Ivory Coast Ghana Guinea		6	Black				Liberia	1	2016	3	5	1	-4	1					0	1		1
M_021	1	1	7	1	1	1	1	1	48	1	1	Nigeria	Nigeria	Nigeria	17	1	1	5	3	1	3	1	0				Black	1	1		Nigeria	1	2017	4	5	5	0	1	1	1			1	1				1
M_022	1	1	7	1	1	1	1	1	61	1	1	Liberia	Liberia	Liberia		1	1	1	1	0	4	1	1	Ghana	2017	2	Black	1	0		Liberia Ghana	1	2017	8	5	5	0		1				1	1	1	1
M_023	1	1	7	1	1	1	1	1	35	1	1	Sierra Leone	Sierra Leone	Sierra Leone	19	1	1	3	2	0			0				African	1	2		Sierra Leone	1	2017	4	1	5	4	1					0	1
M_024	1	1	7	1	1	1	1	0	60	1	1	Cameroon	Cameroon	Cameroon	24	1	1	5	3	1	2	0	1	Gabon	1994	3	Black African American	1	0		Cameroon	1	2017	6	1	5	4	1					0	1			1
M_025	1	1	7	1	1	1	1	1	30	1	1	Cameroon	Cameroon	Cameroon		1	1	4	2	0	5	1	0				Black African American	0			Cameroon	1	2017	4	3	5	2	1					0	1			1	1
M_026	1	1	7	1	0	3	0	1	34	1	0	United States	United States	United States		1	1				4	1	0				Causasian	1	0	none	Ghana	1	2017		1	5	4	1					0	1		1	1	1
M_027	1	1	7	1	1	1	1	0	46	1	1	Nigeria	Nigeria	Nigeria	18	1	1	5	3	1	4	1	0				African American	1	1	no	Nigeria	1	2017	26	5	5	0	1	1				1	1
M_028	1	1	7	1	1	1	1	1	39	1	1	Togo	Togo	Togo	15	1	1	5	3	1	4	1	1	Benin	2000	0.5	Black African	1	1	no	Togo	1	2017	2.5	1	5	4	1	1				1	1	1	1
M_029	1	1	7	1	1	1	1	0	56	1	1	Liberia	Liberia	Liberia	18	1	1	2	2	0	3	1	0				Declined to answer	1	0		Liberia	1	2017	3	3	5	2	1					0	1	1			1
M_030	1	1	7	1	1	1	1	1	63	1	1	Ivory Coast	Ivory Coast	Ivory Coast		1	1	1	1	0							African American	1	1		Ivory Coast	1	2017	4	5	2	-3	1				I don't know	0	1				1
M_031	1	1	7	1	0	3	0	1	49	1	0	United States	United States	United States		1	1	5	3	1	5	1	0				Caucasian	1	0		Liberia	1	2017	4	2	5	3	1					0	1		1		1
M_032	1	1	7	1	1	3	0	1	61	1	0	United States	United States	United States		1	1	1	1	0			0				White	1	0		Ghana	1	2017	3	5	5	0	1	1			Sanitation issues	1	1				1
M_033	1	1	7	0	1	2	1	0	9	0	0	United States	United States	Tanzania		1	1	1	1	0	4	1	0				mixed African American	1	2	her malaria presented atypically no flu like symptoms	Tanzania	0	2017	6	5	5	0	1					0	1				1
M_034	1	1	7	1	1	1	1	1	40	1	1	Liberia	Liberia	Liberia	21	1	1	5	3	1	4	1	1	Ivory Coast	1995	5	Black African American	1	2	no	Ivory Coast	1	2017	3	1	3	2	1					0	1	1	1	1	1
M_035	1	1	7	1	1	1	1	1	56	1	1	Nigeria	Nigeria	Nigeria	36	1	1	5	3	1	5	1	0				Black African	1	1		Nigeria	1	2017	1	5	4	-1	1					0	1				1
M_036	1	1	8	1	1	1	1	1	32	1	1	Liberia	Liberia	Liberia		1	1	1	1	0	4	1	1	Ghana	2001	5	Black African	1	4		Liberia	1	2018	8	1	5	4	1					0	1	1	1	1
M_037	1	1	8	1	1	1	1	0	36	1	1	Sierra Leone	Sierra Leone	Sierra Leone		1	1	3	2	0	0	0	0				African	1	0		Sierra Leone	1	2018	12	5	2	-3	1					0	1				1
M_038	1	1	8	1	1	1	1	1	21	1	1	Nigeria	Congo	Congo	3	1	1	5	3	1	2	0	1	Uganda Kenya South Africa Ivory Coast Italy Congo			Black African	0			Kenya Rwanda Congo South Africa Uganda Burundi Ivory Coast	1	2018	4	1	4	3	1					0	1				1
M_039	1	1	8	0	1	2	1	1	46	1	1	South Sudan	South Sudan	South Sudan	20	1	1	5	3	1	3	1	1	Ethiopia	1991		African American	1	1		Ethiopia South Sudan	0	2018	8	1	1	0	1					0	1	1
M_040	1	1	8	1	1	1	1	1	6	0	1	Netherlands	Ghana	Ghana	1	1	1	1	1	0			0				Black African American	1	0	Be careful with malaria	Ghana	1	2018	8	1	5	4	1					0	1	1
M_041	1	1	8	1	0	3	0	1	32	1	0	United States	United States	United States		1	1	5	3	1	4	1	1	Ghana			White	1	1		Ghana	1	2018	1.5	1	1	0	1					0	1		1	1	1
M_042	1	1	8	1	1	1	1	1	62	1	1	Liberia	Liberia	Liberia	15	1	1	1	1	0	3	1	1	Ivory Coast	2003	10	Black	1	1		Liberia	1	2018	4	1	5	4	1					0	1				1
M_043	1	1	8	1	1	1	1	0	52	1	1	Liberia	Liberia	Liberia	14	1	1	3	2	0	2	0	1	Guinea and Ghana	2004	14	Black African	0			Liberia	1	2018	4	1	3	2	1					0	1	1			1
M_044	1	1	8	0	1	2	1	1	46	1	1	Kenya	Kenya	Kenya	21	1	1	5	3	1	5	1	0				Black or African American	1	0	In Kenya they have malaria medications over the counter people recognize the malaria signs and symptoms and then they go get the medications then they live We should have something similar here in the USA	Kenya	0	2018	3	1	5	4	1					0	1	1	1	1	1
M_045	1	1	8	1	1	1	1	1	48	1	1	Liberia			18	1	1										Black or African American				Liberia	1	2018	1.5	1	5	4	1					0	1	1
M_046	1	1	8	0	1	2	1	1	48	1	1	South Africa	South Africa	South Africa	20	1	1	5	3	1			0				Caucasian	0			South Africa	0	2018	1.5	1	5	4	1					0	1	1	1	1	1
M_047	1	1	8	1	1	1	1	0	27	1	1	Liberia	Liberia	Liberia	15	1	1	4	2	0	4	1	1	Ghana	2003	2	African Black	0		I was pleased how well the hospital handled my case	Liberia	1	2018	2.5	5	5	0	1					0	1		1		1
M_048	1	1	8	1	0	1	1	1	50	1	1	Liberia	Liberia	Liberia	18	1	1	5	3	1	5	1	0				Black	1	0		Liberia	1	2018	10	1	3	2	1					0	1	1	1	1	1
M_049	1	1	8	1	1	1	1	1	48	1	1	Sierra Leone	Sierra Leone	Sierra Leone	3	1	1	4	2	0	0	0	0				African	1	0		Sierra Leone Guinea	1	2018	20	1	5	4	1					0	1			1	1
M_050	1	1	8	1	1	1	1	1	38	1	1	Nigeria	Nigeria	Nigeria	11	1	1				4	1	0				African	1	1	Provide more education on malaria Let people know it's not transmitted through people and not contagious	Nigeria	1	2018	2	1	5	4	1					0	1	1		1	1
M_051	1	1	8	1	0	3	0	1	72	1	0	United States	United States	United States		1	1	5	3	1	5	1	0				Caucasian	1	0	Doxycycline may have been counterfeit I ran out of malaria medication from USA and bought doxycycline from a pharmacy in Sierra Leone	Sierra Leone	1	2018	4	5	5	0	1					0	1		1	1	1
M_052	1	1	8	0	1	2	1	0	28	1	1	Sudan	South Sudan	South Sudan	18	1	1	1	1	0	3	1	0				African	1	0		Uganda	0	2018	2	5	5	0	1					0	1	1	1	1	1
T_001	1	3	4	0	1	3	0	1	23	1	0	United States	United States	United States		1	0	1	1	0	4	1	0				White	0			Tanzania	0		7	1	5	4	1					0	1				1
T_002	1	3	5	0	0	3	0	1	55	1	0	United States	United States	United States		0	0	0	1	0	2	0	0				Caucasian	1	0		Tanzania	0		2	1	5	4						1	1
T_003	1	3	4	0	0	3	0	0	64	1	0	United States	United States	United States		0	0	0	1	0	5	1	0				White	1	1		Kenya Tanzania	0		2	3	4	1	1					0	1		1		1
T_004	1	3	5	0	0	3	0	0	67	1	0	United States	United States	United States		0	0	0	1	0	5	1	0				Caucasian	1	2		Tanzania	0		2	3	2	-1	1					0	1				1
T_005	1	3	4	0	0	3	0	1	69	1	0	United States	United States	United States		0	0	0	1	0	5	1	0				White	1	2		Tanzania	0		2	5	5	0	1	1				1	0
T_006	1	3	4	1	1	1	1	0	42	1	1	Guinea	Guinea	Guinea	18	1	0	1	1	0	2	0	0				Forest Guinea	1	1		Guinea	1		3	2	5	3	1	1				1	1		1	1
T_007	1	3	4	1	1	3	0	0	62	1	0	United States	United States	United States		1	0	1	1	0	3	1	0				Caucasian	1	2		Benin	1		2	3	1	-2	1					0	1			1	1
T_008	1	3	4	0	0	3	0	0	67	1	0	United States	United States	United States		0	0	0	1	0	5	1	0				Caucasian	1	2		South Africa	0		2	3	5	2	1					0	1	1	1		1
T_009	1	3	5	1	1	3	0	1	54	1	1	Panama	Panama	Panama	31	1	0	5	3	1	3	1	0				Latino	1	1		Ghana	1		3	5	5	0	1					0	1	1	1	1	1
T_010	1	3	4	0	0	3	0	1	55	1	1	Nigeria	Nigeria	Nigeria	36	1	0	5	3	1	5	1	0				Black	1	2		Malawi	0		2	5	5	0	1					0	1					1
T_011	1	3	4	0	0	3	0	0	54	1	1	Nigeria	Nigeria	Nigeria	35	1	0	5	3	1	5	1	0				African	1	0		Malawi	0		2	1	5	4	1					0	1			1	1
T_012	1	3	4	0	0	3	0	0	73	1	0	United States	United States	United States		1	0	5	3	1	4	1	0				White	1	1		Kenya Tanzania Zambia	0		2	3	5	2	1					0	1		1	1	1
T_013	1	3	4	0	0	3	0	1	77	1	0	United States	United States	United States		1	0	5	3	1	4	1	0				Caucasian	1	2		Kenya Tanzania Zambia	0		2	3	5	2	1					0	1		1		1
T_014	1	3	5	1	1	1	1	1	57	1	1	Nigeria	Nigeria	Nigeria	30	1	0	5	3	1	5	1	0				Black	1	0		Nigeria	1		2	5	5	0	1					0	1		1	1
T_015	1	3	4	0	0	3	0	1	58	1	0	United States	United States	United States		0	0	0	1	0	3	1	0				White	1	2		South Africa Zimbabwe	0		3	1	5	4	1					0	1	1
T_016	1	3	4	0	0	3	0	0	63	1	0	United States	United States	United States		0	0	0	1	0	5	1	0				White	1	1		Zimbabwe Kenya Tanzania	0		2	3	5	2	1					0	1		1	1
T_017	1	3	4	0	0	3	0	1	68	1	0	United States	United States	United States		0	0	0	1	0	4	1	0				White	1	1		South Africa Kenya Zimbabwe	0		2	1	1	0	1					0	1		1		1
T_018	1	3	4	0	1	2	1	1	28	1	1	Somalia	Somalia	Somalia	18.5	0	0	0	1	0	4	1	0				Black Somalia american	1	2		Somalia Ethiopia	0			3	5	2	1	1		1		1	1		1	1
T_019	1	3	4	0	0	3	0	1	66	1	0	United States	United States	United States		1	0	5	3	1	5	1	0				White	1	1		South Africa Zimbabwe	0		2	3	5	2	1					0	1				1
T_020	1	3	5	0	0	3	0		32	1						0	0	0	1	0											Tanzania	0		1	5	5	0	1					0	1		1	1
T_021	1	3	4	0	0	3	0	0	64	1	0	United States	United States	United States		0	0	0	1	0	4	1	0				Caucasian	1	1		South Africa	0		2	2	5	3	1					0	1				1
T_022	1	3	4	0	0	3	0	1	32	1	0	United States	United States	United States		0	0	0	1	0	5	1	1	Mexico	2007	0.33	Caucasian	1	1		Uganda Rwanda Tanzania Kenya	0		3	3	2	-1	1					0	1		1	1
T_023	1	3	4	0	0	3	0	0	45	1	0	United States	United States	United States		1	0	1	1	0	4	1					Caucasian	1	2		Kenya Tanzania	0		2	2	4	2	1					0	1	1
T_024	1	3	4	0	0	3	0	1	61	1	0	United States	United States	United States		0	0	0	1	0	4	1	0				Caucasian	1	1		Botswana South Africa Namibia Zimbabwe	0		3	3	5	2	1					0	1				1
T_025	1	3	5	0	0	3	0	1	62	1	0	United States	United States	United States		0	0	0	1	0	4	1	0				White	1	1		Tanzania Kenya	0		2	3	5	2	1					0	1				1
T_026	1	3	5	0	1	2	1	0	25	1	1	Ethiopia	Ethiopia	Ethiopia	10	1	0	1	1	0	3	1	1	Kenya			Oromo	1	0		Ethiopia	0		39	3	5	2	1					0	1	1
T_027	1	3	4	0	0	3	0	0	57	1	0	United States	United States	United States		1	0	5	3	1	5	1	0				Caucasian	1	0		Kenya	0		1.5	3	5	2	1					0	1			1	1
T_028	1	3	4	0	0	3	0	1	65	1	0	United States	United States	United States		0	0	0	1	0	3	1	0				Caucasian	1	0		Tanzania	0			3	5	2	1					0	1				1
T_029	1	3	4	1	1	1	1	0	34	1	1	Liberia	Liberia	Liberia	18	0	0	0	1	0	3	1	1	Ghana	2000	4	American	1	0		Liberia	1		4	5	5	0	1	1				1	1				1
T_030	1	3	5	0	0	3	0	0	27	1	0	United States	United States	United States		0	0	0	1	0	4	1	0				White	1	1		Uganda	0		2	3	5	2	1					0	1	1			1
T_031	1	3	4	0	0	3	0	0	60	1	0	United States	United States	United States		0	0	0	1	0	3	1	0				White	1	0		Tanzania	0		1.5	3	5	2	1	1				1	1	1			1
T_032	1	3	5	0	0	3	0	1	58	1	0	United States	United States	United States		0	0	0	1	0	4	1	0				White	1	0		Tanzania	0		1	4	3	-1	1					0	1				1
T_033	1	3	4	0	0	3	0	1	72	1	0	United States	United States	United States		1	0	2	2	0	5	1	0				White	1	1		Kenya Tanzania Rwanda	0		2	3	5	2	1					0	1		1	1	1
T_034	1	3	4	0	0	3	0	0	73	1	0	United States	United States	United States		1	0	3	2	0	5	1	0				White	1	2		Kenya Tanzania Rwanda	0		2	1	5	4	1					0	1				1
T_035	1	3	5	0	1	2	1	0	39	1	1	Kenya	Kenya		5	0	0	0	1	0	4	1	0				African	1	1		Kenya	0		4	1	5	4	1					0	1		1	1	1
T_036	1	3	4	1	1	1	1	1	48	1	1	Nigeria	Nigeria	Nigeria	18	1	0	4	2	0	4	1	0				African American	1	1		Nigeria	1		2	4	2	-2	1					0	1				1	1
T_037	1	3	4	1	0	3	0	0	65	1	0	United States	United States	United States		1	0	3	2	0	5	1	0				African American	1	0		Kenya Ghana	1		3	1	5	4	1					0	1		1	1
T_038	1	3	4	0	0	3	0	0	41	1	0	United States	United States	United States		0	0	0	1	0	4	1	0				European White	0			Kenya	0		1.5	1	4	3	1					0	1		1	1	1
T_039	1	3	4	0	0	3	0	1	41	1	0	United States	United States	United States		0	0	0	1	0	3	1	0				Caucasian	1	0		Kenya	0		1.5	3	5	2	1					0	1				1
T_040	1	3	4	0	0	3	0	0	73	1	0	United States	United States	United States		0	0	0	1	0	4	1	0				Caucasian	0			Kenya	0		2	1	4	3	1					0	1	1
T_041	1	3	4	1	0	3	0	0	60	1	0	United States	United States	United States		1	0	1	1	0	5	1	0				Caucasian	0			Senegal	1		7.14	1	5	4	1	1				1	1		1		1
T_042	1	3	5	0	1	2	1	1	65	1	1	Ethiopia	Ethiopia	Ethiopia	3	0	0	0	1	0	2	0	0				Oromo	1	0		Ethiopia	0		12	1	5	4	1					0	1
T_043	1	3	5	0	0	3	0	0	66	1	0	United States	United States	United States		0	0	0	1	0	5	1	0				White	1	0		Tanzania	0		2	3	2	-1	1	1				1	1				1
T_044	1	3	4	1	0	3	0	0	59	1	0	United States	United States	United States		0	0	0	1	0	5	1	0				Black American	1	0	Question 6 Did not know if she had had malaria She said that as child in TN she had reactions to the 'smoke' from mosquito fumigation and was never diagnosed with malaria Question 26 Did Not Answer She said she would take medications that were not sulfa based She was very appreciative of HP and MN Dep't of Health for doing this survey	Ghana	1		1	5	4	-1	1					0	1			1	1
T_045	1	3	5	0	1	3	0	1	32	1	0	United States	United States	United States		1	0	5	3	1	5	1	0				White	0			Kenya	0		1	2	5	3	1				Blood infections	0	1		1	1	1
T_046	1	3	4	0	1	3	0	0	37	1	1	India	India	India	18	1	0	5	3	1	5	1	0				I choose not to answer	1	1	No 16 and No 17e she said she couldn't recall	Kenya	0		4	5	5	0	1					0	1				1
T_047	1	3	5	0	1	2	1	1	39	1	1	Kenya	Kenya	Kenya	15	1	0	5	3	1	5	1	0				African	1	1		Kenya	0		2	2	4	2	1					0	1	1		1
T_048	1	3	4	0	0	3	0	1	72	1	0	United States	United States	United States		1	0	4	2	0	5	1	0				Caucasian	1	2		South Africa	0		2	1	5	4	1					0	1				1
T_049	1	3	5	0	0	3	0	1	65	1	1	Australia	Australia	Australia	16	1	0	5	3	1	5	1	0				White	1	2		Ethiopia Kenya	0		1	5	5	0	1					0	1					1
T_050	1	3	4	0	0	3	0	0	63	1	0	United States	United States	United States		1	0	5	3	1	5	1	0				White	1	2		Tanzania	0		3	3	5	2						1	1				1
T_051	1	3	5	0	1	2	1	1	60	1	1	Eritrea	Eritrea	Eritrea	26	1	0	4	2	0	1	0	1	Sudan	1992		Eritrean	1	0		Eritrea	0		2	4	5	1	1	1				1	1				1
T_052	1	3	5	0	0	3	0	0	59	1	0	United States	United States	United States		0	0	0	1	0	5	1	0				Native American	1	2		Tanzania	0		2	5	4	-1	1					0	1				1
T_053	1	3	4	1	1	3	0	1	37	1	0	United States	United States	United States		0	0	0	1	0	3	1	0				White	1	2		Togo	1		1	2	5	3	1					0	1				1
T_054	1	3	5	0	0	3	0	1	19	1	0	United States	United States	United States		0	0	0	1	0	2	0	0				Caucasian	1	1		Mozambique	0		104	5	5	0	1					0	1	1
T_055	1	3	4	1	0	3	0	0	19	1	0	United States	United States	United States		0	0	0	1	0	2	0	0				African American	1	3		Ghana	1		2	2	5	3	1					0	1
T_056	1	3	4	1	0	3	0	0	42	1	0	United States	United States	United States		1	0	5	3	1	5	1	0				White	1	2		Sierra Leone	1		2	2	5	3	1					0	1				1
T_057	1	3	5	0	1	2	1	0	36	1	1	Ethiopia	Ethiopia	Ethiopia	14	1	0	5	3	1	2	0	0				African American	1	0		Ethiopia	0		16	5	5	0	1					0	1			1
T_058	1	3	4	0	0	3	0	1	65	1	0	United States	United States	United States		1	0	2	2	0	4	1	0				Caucasian	1	2	#22 Did not answer because he said there were no children on previous trip to Africa	Tanzania	0		3	3	5	2		1				1	0
T_059	1	3	5	0	0	3	0	0	67	1	0	United States	United States	United States		0	0	0	1	0	4	1	0				Caucasian	1	1	#10 a Said she didn't know whether or not she would use bed nets	South Africa Botswana Kenya Tanzania Zimbabwe	0		3	5	5	0	1					0	1				1	1
T_060	1	3	5	0	0	3	0	1	56	1	0	United States	United States	United States		0	0	0	1	0	5	1	0				White	1	0		Kenya Madagascar	0		2	3	5	2	1					0	1				1	1
T_061	1	3	4	0	0	3	0	1	25	1	0	United States	United States	United States		0	0	0	1	0	4	1	0				Caucasian	1	4		Uganda Kenya	0		2	1	3	2	1					0	1
T_062	1	3	4	0	0	3	0	1	65	1	0	United States	United States	United States		0	0	0	1	0	5	1	0				White	1	1		Tanzania	0		2	1	5	4	1	1				1	1				1
T_063	1	3	4	0	0	3	0	0	66	1	0	United States	United States	United States		0	0	0	1	0	5	1	0				Caucasian	1	2		Tanzania	0		2	3	5	2	1					0	1				1
T_064	1	3	4	0	0	3	0	1	56	1	0	United States	United States	United States		0	0	0	1	0	5	1	0				White	1	1		Tanzania	0		2	3	4	1	1					0	1	1
T_065	1	3	5	0	0	3	0	0	30	1	0	United States	United States	United States		1	0	2	2	0	5	1	0				White	1	2		Kenya	0		2	1	5	4	1					0	1	1
T_066	1	3	4	1	1	1	1		59	1						0	0	0	1	0											Liberia	1		8	5						1		1	1					1
T_067	1	3	4	0	0	3	0	0	73	1	0	United States	United States	United States		0	0	0	1	0	5	1	0				Caucasian	1	1		South Africa	0		5	5	3	-2	1					0	1				1
T_068	1	3	4	0	1	2	1	0	27	1	1	Ethiopia	Ethiopia	Ethiopia	13	1	0	1	1	0	3	1	0				African	1	1		Ethiopia	0		8	1	5	4	1				People's feces	1	1	1		1
T_069	1	3	5	0	1	2	1	1	58	1	1	Ethiopia	Ethiopia	Ethiopia	30	1	0	3	2	0	1	0	1	Kenya	1989	8	African	1	0		Kenya	0		3	3	5	2	1					0	0
T_070	1	3	4	1	1	3	0	0	57	1	0	United States	United States	United States		1	0	5	3	1	4	1	0				Caucasian	1	2		Ghana	1		10	3	5	2	1					0	1				1
T_071	1	3	4	1	1	1	1	1	60	1	1	Ghana	Ghana	Ghana	38	1	0	5	3	1	3	1	0				Black American	1	1		Ghana	1		10	3	5	2	1					0	1			1	1
T_072	1	3	4	0	1	2	1	1	36	1	1	Ethiopia	Ethiopia	Ethiopia	11	1	0	1	1	0	2	0	0				Black	1	4		Ethiopia	0		3	5	5	0	1					0	1		1		1
T_073	1	3	5	0	1	2	1	0	29	1	1	Zambia	Somalia	Somalia	9	1	0	4	2	0	3	1	0				Black	1	3	Question #22 No answer Did not travel with any children	Zambia	0		5	3	3	0	1					0	1		1	1
T_074	1	3	4	1	1	3	0	0	59	1	0	United States	United States	United States		0	0	0	1	0	5	1	0				Native Black American	1	1		Ghana	1		2	1	5	4	1					0	1					1
T_075	1	3	4	0	0	3	0	1	70	1	0	United States	United States	United States		1	0	5	3	1	5	1	0				Caucasian	1	0		Tanzania	0		2	2	3	1	1					0	1		1		1
T_076	1	3	5	0	1	3	0	0	56	1	0	United States	United States	United States		0	0	0	1	0	3	1	0				African American	0			Kenya	0		3	5	5	0		1				1	1
T_077	1	3	4	0	1	2	1		39	1						1	0														Ethiopia	0		16	5	5	0	1					0	1		1
T_078	1	3	4	0	0	3	0	0	40	1	0	United States	United States	United States		1	0	3	2	0	3	1	0				Caucasian	1	0		Uganda	0		1	3	5	2	1					0	1				1
T_079	1	3	4	1	0	3	0	1	32	1			United States	United States		0	0	0	1	0	5	1	0				Caucasian	1	3		Senegal	1		1	3	5	2	1					0	1				1
T_080	1	3	4	0	0	3	0	0	58	1	0	United States	United States	United States		0	0	0	1	0	5	1	0				White	1	1		South Africa Zimbabwe	0		3	2	3	1	1					0	1				1
T_081	1	3	4	0	0	3	0	1	68	1	0	United States	United States	United States		1	0	1	1	0	4	1	0				Asian American	1	0		South Africa Botswana	0		4	3	5	2	1					0	1		1	1
T_082	1	3	4	0	0	3	0	0	34	1	0	United States	United States	Scotland		0	0	0	1	0	5	1	0				Caucasian	1	2		South Africa	0		2	2	5	3	1					0	1	1		1
T_083	1	3	4	0	0	3	0	0	57	1	0	United States	United States	United States		1	0	1	1	0	4	1	0				White	0			Tanzania Uganda	0		2	3	5	2	1					0	0
T_084	1	3	4	0	0	3	0	0	64	1	0	United States	United States	United States		1	0	3	2	0	5	1	0				Caucasian	1	2		Tanzania	0		3	5	5	0	1					0	1				1
T_085	1	3	4	1	1	1	1	0	31	1	0	United States	United States	Nigeria		0	0	0	1	0	3	1	0				African	1	0		Nigeria	1		1	1	4	3	1					0	1
T_086	1	3	4	0	0	3	0	0	29	1	0	United States	United States	United States		0	0	0	1	0	5	1	0				White	1	2		Tanzania	0		2	3	5	2	1					0	1		1	1	1
T_087	1	3	5	0	0	3	0	0	22	1	0	United States	Australia	United States		0	0	0	1	0	4	1	0				Caucasian	1	1		Swaziland	0		2	3	5	2	1					0	1				1
T_088	1	3	5	1	1	1	1	1	68	1	1	Nigeria	Nigeria	Nigeria		1	0				4	1	0					1	0		Nigeria	1		8	1	4	3						1	1
T_089	1	3	4	0	0	3	0	1	76	1	0	United States	United States	United States		1	0	5	3	1	4	1	0				White	1	1		Tanzania Kenya	0		3	3				1				0	1
T_090	1	3	4	0	0	3	0	1	71	1	0	United States	United States	United States		0	0	0	1	0	5	1	0				White	1	0		Tanzania	0		2	5	5	0	1					1	1		1
T_091	1	3	5	1	1	1	1	0	23	1	1	Liberia	Liberia	Liberia	14	1	0	1	1	0	3	1	0				African	1	1		Liberia	1		3	5	5	0						1	1	1			1
T_092	1	3	5	0	0	3	0	0	42	1	0	United States	United States	United States		0	0	0	1	0	5	1	0				Hispanic	1	0		Kenya	0		2	2	5	3	1					0	1	1	1	1
T_093	1	3	4	0	1	2	1	0	52	1	1	Ethiopia	Ethiopia	Ethiopia	14	1	0	1	1	0	2	0	0					1	0		Ethiopia	0		12	5	5	0	1				Living by lakes	1	1	1			1
T_094	1	3	4	0	1	2	1	1	35	1	1	Somalia	Somalia	Somalia	15	0	0	0	1	0	2	0	1	Kenya	2003	5	Somali	1	3		Ethiopia Somalia	0		6	2	1	-1	1					0	1		1	1
T_095	1	3	5	1	0	3	0	0	20	1	0	United States	United States	United States		0	0	0	1	0	3	1	0				White	1	0		Ghana South Africa	1		12	2	5	3	1					0	1				1
T_096	1	3	5	0	0	3	0	0	25	1	0	United States	United States	United States		0	0	0	1	0	4	1	0				White	0			Tanzania	0		2	1	5	4	1				Blood sharing	0	1				1
T_097	1	3	4	0	0	3	0	1	22	1	0	United States	United States	United States		0	0	0	1	0	3	1	0				Caucasian	1	2		Zambia	0		2	1	5	4	1					0	1		1	1	1
T_098	1	3	5	0	1	2	1	1	74	1	1	Sudan	Sudan	Sudan	8	1	0	3	2	0	5	1	1	Libya	1989	10	Black African	1	1		Sudan	0		14	5	3	-2	1					0	1		1		1	1
T_099	1	3	5	0	0	3	0	0	49	1	1	South Korea	South Korea	South Korea	45	1	0	3	2	0	4	1	0				Asian	1	2		Ethiopia	0		2	3	5	2	1					0	1	1			1
T_100	1	3	4	0	0	3	0	0	69	1	0	United States	United States	United States		1	0	5	3	1	3	1	1	Kenya	1990	0.5	White	1	2		Tanzania	0		2	5	5	0	1				Saliva of mosquito	0	1	1			1
T_101	1	3	4	0	0	3	0	1	47	1	0	United States	United States	United States		1	0	5	3	1	4	1	0				White	1	1		Kenya Uganda	0		1	4	5	1	1					0	1				1
T_102	1	3	5	0	1	2	1	0	32	1	1	Somalia	Somalia	Somalia	12	1	0	1	1	0	1	0	1	Kenya	2006		Somali	1	0		Somalia	0		16	5	5	0	1					0	1	1			1
T_103	1	3	4	1	0	3	0		52	1						1	0				5	1	0					1		Didn't feel comfortable to answer some of the questions	Ghana	1		3	1	1	0	1					0	1	1			1
T_104	1	3	5	0	0	3	0	0	21	1	0	United States	United States	United States		0	0	0	1	0	1	0	0				White	1	1		South Africa	0		3	3	4	1	1			1	Blood	1	1	1	1		1
T_105	1	3	4	1	0	3	0	1	63	1	1	Nigeria	Nigeria	Nigeria	50	1	0	5	3	1	5	1	0				Black	1	1		Nigeria	1		7	4	4	0	1					0	1				1
T_106	1	3	5	0	0	3	0	0	28	1	0	United States	United States	United States		0	0	0	1	0	4	1	0				White	0			Kenya	0		2	1	5	4	1					0	1			1	1
T_107	1	3	4	1	0	3	0	0	32	1	0	United States	United States	United States		0	0	0	1	0	4	1	0				White	1	2		Rwanda Tanzania Liberia	1		3	3	3	0	1					0	1				1
T_108	1	3	5	0	0	3	0	0	31	1	1	Somalia	Somalia	Ethiopia	12	0	0	0	1	0	0	0	0				Black Somali	1	0		Kenya	0		26	5	5	0	1					0	1	1			1
T_109	1	3	5	0	0	3	0	1	36	1	1	Somalia	Somalia	Somalia	12	0	0	0	1	0	2	0	1	Kenya	2006		Black Somali	1	1		Kenya	0		3	3	5	2	1					0	1	1		1	1
T_110	1	3	4	0	0	3	0	0	65	1	1	Germany	Germany	Germany	64	0	0	0	1	0	5	1	0				Caucasian	1	2		Tanzania	0		2	1	5	4	1					0	1				1
T_111	1	3	4	0	0	3	0	0	37	1	0	United States	United States	United States		0	0	0	1	0	4	1	0				White	1	2		South Africa	0		2.5	3	5	2	1					0	1			1	1
T_112	1	3	4	0	0	3	0	1	66	1	0	United States	United States	United States		0	0	0	1	0	5	1	0				White	1	1		Tanzania	0		2	3	5	2	1	1				1	1		1
T_113	1	3	5	0	0	3	0	0	59	1	0	United States	United States	United States		1	0	5	3	1	5	1	0				Caucasian	1	2		Tanzania	0		2	1	5	4	1	1				1	1				1
T_114	1	3	4	0	0	3	0	0	30	1	0	United States	United States	United States		0	0	0	1	0	4	1	0				White	1	0		South Africa	0		1.5	1	5	4			1	1		1	1				1
T_115	1	3	5	1	0	3	0	1	20	1	0	United States	United States	United States		0	0	0	1	0	3	1	0				Caucasian	1	1		Ghana South Africa	1		12	1	5	4	1					0	1				1
T_116	1	3	4	0	0	3	0	1	71	1	0	United States	United States	United States		1	0	1	1	0	5	1	0				White	1	3		Tanzania	0		3	2	5	3	1					0	1			1	1
T_117	1	3	5	0	0	3	0	0	21	1	0	United States	United States	United States		0	0	0	1	0	3	1	0				Caucasian	0			Zambia	0		2	3	5	2	1					0	1				1
T_118	1	3	4	1	1	1	1	0	25	1	1	Sierra Leone	Sierra Leone	Sierra Leone	6	1	0	1	1	0	2	0	0				African	1	1		Sierra Leone	1		8	4	5	1	1	1				1	1				1
T_119	1	3	4	0	0	3	0	1	68	1	0	United States	United States	United States		1	0	5	3	1	5	1	0				Scottish	1	2		Kenya South Sudan	0		4	5	5	0	1					0	1		1	1	1
T_120	1	3	4	0	0	3	0	0	53	1	0	United States	United States	United States		1	0	1	1	0	5	1	0				White	1	1		Ethiopia	0		1.5	4	5	1	1				Blood to blood &body fluids	0	1				1
T_121	1	3	4	1	1	3	0	1	64	1	0	United States	United States	United States		1	0	4	2	0	5	1	0				Caucasian	1	4		Senegal	1		2.5	2	5	3	1					0	1	1			1
T_122	1	3	4	1	1	1	1	0	58	1	1	Gambia	Guinea	Guinea	32	1	0	5	3	1	2	0	0				African	1	1		Senegal	1		6	5	5	0	1					0	1				1
T_123	1	3	4	1	1	1	1	0	23	1	0	United States	Gambia	United States		1	0	5	3	1	4	1	0				African American	1	1		Senegal	1		2	3	3	0		1				1	1				1
T_124	1	3	5	0	0	3	0	0	37	1	0	United States	United States	United States		0	0	0	1	0	5	1	0				Caucasian	1	1		South Africa	0		2	3	5	2	1					0	1				1
T_125	1	3	5	0	0	3	0	1	54	1	0	United States	United States	United States		1	0	4	2	0	5	1	1	Bolivia	1995	3	White	0			Ethiopia	0		2	1	3	2	1					0	1				1
T_126	1	3	5	0	0	3	0	1	30	1	0	United States	United States	United States		0	0	0	1	0	4	1	0				White	1	0		Tanzania	0		1.5	2	5	3	1					0	1	1			1
T_127	1	3	4	1	1	1	1	0	64	1	1	Ghana	Ghana	Ghana	40	1	0	5	3	1	3	1	0				Black African American	1	2		Ghana	1		4	1	5	4	1					0	1		1	1	1
T_128	1	3	5	0	0	3	0	0	76	1	0	United States	United States	United States		1	0	5	3	1	4	1	0				White	1	2		South Africa	0		3	3	5	2	1	1				1	1	1			1
T_129	1	3	4	0	0	3	0	0	35	1	0	United States	United States	United States		1	0	5	3	1	5	1	1	Guatemala	2010	6	White	0			Uganda	0		1	3	5	2	1					0	1			1	1
T_130	1	3	4	0	0	3	0	1	39	1	0	United States	United States	United States		1	0	5	3	1	5	1	0				African American	0			Uganda	0		1	3	4	1	1					0	1				1
T_131	1	3	4	0	0	3	0	0	43	1	0	United States	United States	United States		0	0	0	1	0	5	1	0				African American	1	1		Uganda	0		2	3	5	2	1					0	1		1	1
T_132	1	3	4	0	0	3	0	0	67	1	0	United States	United States	United States		1	0	5	3	1	5	1	0				Caucasian	1	0	You raised some good questions about what I know about malaria Now I want to make sure that what I know is correct	Zimbabwe Botswana Namibia	0		3	2	5	3	1					0	1			1	1
T_133	1	3	5	0	0	3	0	0	24	1	0	United States	United States	United States		0	0	0	1	0	4	1	0				Caucasian	1	0		Uganda	0		2	2	5	3	1					0	1				1
T_134	1	3	5	0	1	2	1	1	58	1	1	Sudan	Sudan	Sudan	30	1	0	5	3	1	3	1	0				Afro American	1	1		Sudan	0		6	3	5	2	1					0	1				1
T_135	1	3	4	0	0	3	0	0	52	1	0	United States	United States	United States		1	0	4	2	0	5	1	0				Caucasian	0			Kenya	0		2	1	5	4	1					0	1				1
T_136	1	3	4	0	0	3	0	1	66	1	1	Germany	Germany	Germany	26	0	0	0	1	0	5	1	0				White	1	1		South Africa	0		2	5	5	0					Through an insect like a fly	1	1				1
T_137	1	3	5	1	0	3	0	0	50	1	0	United States	United States	United States		0	0	0	1	0	4	1	0				Caucasian	1	2		Liberia	1		2	3	3	0		1			Bacteria	1	1	1
T_138	1	3	5	0	0	3	0	0	57	1	0	United States	United States	United States		0	0	0	1	0	3	1	0				Caucasian	0			South Africa	0		2	1	5	4	1					0	1				1
T_139	1	3	4	0	0	3	0	1	73	1	0	United States	United States	United States		1	0	5	3	1	5	1	0				Caucasian	1	0		Tanzania	0		2	2	5	3					Insects carry malaria	1	1			1
T_140	1	3	4	0	0	3	0	0	72	1	0	United States	United States	United States		1	0	3	2	0	5	1	0				White	1	0		Tanzania	0		2	4	5	1	1					0	1				1
T_141	1	3	5	0	0	3	0	1	30	1	1	France	France	France	5	0	0	0	1	0	5	1	0				Caucasian	1	2	I hope my answers will be helpful	Kenya Tanzania	0		2	2	5	3		1				1	1	1
T_142	1	3	4	0	0	3	0	0	48	1	1	Nicaragua	Nicaragua	Honduras	47	0	0	0	1	0	5	1	1	Honduras	1990	0.25	Latina	1	0		Tanzania	0		2	1	5	4	1					0	1			1	1	1
T_143	1	3	4	1	1	1	1	1	28	1	1	Liberia	Liberia	Liberia	16	1	0	3	2	0	5	1	0				Black	1	2		Liberia	1		4	1	5	4	1	1				1	1	1
T_144	1	3	5	1	1	1	1	1	56	1	1	Sierra Leone	Sierra Leone	Sierra Leone	8	0	0	0	1	0	4	1	0				Creole	1	1		Sierra Leone	1		4	5	5	0	1					0	1		1		1
T_145	1	3	5	0	1	2	1	0	35	1	1	Somalia	Somalia	Somalia	2	0	0	0	1	0	0	0	1	Kenya	2016		Black	1	1		Uganda	0		8	5	3	-2	1	1	1			1	1	1	1	1	1
T_146	1	3	4	1	1	3	0	0	56	1	0	United States	United States	United States		1	0	5	3	1	5	1	1	Burundi Cameroon Senegal	1999	5		1	2		Senegal	1			3	5	2	1					0	1		1	1
T_147	1	3	5	0	1	2	1	1	51	1	1	Ethiopia	Ethiopia	Ethiopia	22	1	0	1	1	0	4	1	0				Black	1	1		Ethiopia Eritrea	0		5	2	5	3	1				Bacteria	1	1				1
T_148	1	3	4	1	1	1	1	0	37	1	0	United States	Nigeria	Nigeria		1	0	5	3	1	5	1	1	Kuwait	1990	3	Black	1	1		Nigeria	1		2	5	3	-2	1					0	1		1		1
T_149	1	3	4	1	1	1	1	1	44	1	1	Nigeria	Nigeria	Nigeria	22	1	0	4	2	0	5	1	0				Black	0			Nigeria	1		2	3	2	-1	1					0	1				1
T_150	1	3	5	0	1	2	1	0	48	1	1	Ethiopia	Ethiopia	Ethiopia	27	1	0	4	2	0	3	1	0				Black	1	2		Ethiopia	0		6	5	3	-2	1					0	1	1	1		1
T_151	1	3	4	1	1	1	1	1	37	1	1	Liberia	Liberia	Liberia	20	0	0	0	1	0	5	1	1	Ivory Coast	1999	2	African	1	3		Liberia	1		4	5	4	-1	1					0	1		1		1	1
T_152	1	3	4	0	1	2	1	1	39	1	1	Kenya	Kenya	Kenya	19	1	0	5	3	1	5	1	1	India	1999	2	Black African American	1	0		Kenya South Africa	0		3	2	3	1	1					0	1				1
T_153	1	3	4	1	1	1	1	1	45	1	1	Togo	Togo	Togo	20	0	0	0	1	0	3	1	0				Black African	1	0		Togo	1		3	1	5	4	1					0	1			1	1	1
T_154	1	3	5	0	1	3	0	1	20	1	0	United States	United States	United States		0	0	0	1	0	3	1	0				African American and White	1	0	Did not answer 26 with yes or no because wants to know more at the travel clinic visit about the types of medications available and what is involved with taking these medications	Kenya	0		2	3	3	0	1					0	1				1
T_155	1	3	4	0	1	2	1	0	52	1	1	Ethiopia	Ethiopia	Ethiopia	24	0	0	0	1	0	3	1	0				Black	1	0		Ethiopia	0		4	3	5	2		1				1
T_156	1	3	4	0	1	2	1	0	38	1	1	Kenya	Kenya	Kenya	17	1	0	1	1	0	4	1	0				Black African American	1	1		Kenya	0		3	5	5	0	1					0	1			1	1
T_157	1	3	5	1	1	1	1	1	49	1	1		Africa	Africa		0	0	0	1	0	3	1					Black	1	0	Didn't answer some of the questions he said it's personal	Liberia	1		5	5	3	-2	1					0	1	1	1
T_158	1	3	4	1	1	1	1	0	22	1	1	Liberia	Liberia		18	1	0	4	2	0	3	1	0				Black	1	0		Ghana	1		2	1	5	4	1					0	1		1	1	1
T_159	1	3	4	1	1	1	1	1	32	1	1	Canada	Ghana	Ghana	20	0	0	0	1	0	4	1	0				Black Canadian	0			Ghana	1		1	1	5	4	1					0	1	1			1
T_160	1	3	4	1	1	1	1	1	35	1	1	Ivory Coast	Ivory Coast	Ivory Coast	18	1	0	5	3	1	5	1	0				Black African descent	1	1		Burkina Faso	1		3	3	5	2	1					0	1				1
T_161	1	3	4	1	1	1	1	0	35	1	1	Burkina Faso	Burkina Faso	Burkina Faso	14	1	0	5	3	1	5	1	1	Senegal	2004	2	Black	1	1		Burkina Faso	1		3	5	5	0	1					0	1				1
T_162	1	3	4	1	1	1	1	1	45	1	1	Liberia	Liberia	Liberia	27	1	0	5	3	1	4	1	0				Black	1	2		Liberia	1		2	5	5	0	1					0	1		1	1	1
T_163	1	3	5	0	1	2	1	1	53	1	1	Ethiopia	Ethiopia	Ethiopia	23	1	0	1	1	0	5	1	0				Black African	1	0		Ethiopia	0		8	1	5	4	1					0	1	1				1
T_164	1	3	4	1	1	1	1	1	53	1	1	Nigeria	Nigeria	Nigeria	29	1	0	5	3	1	5	1	0				Black	1	2		Nigeria	1		3	3	5	2	1					0	1	1
T_165	1	3	4	0	1	2	1	0	37	1	1	Ethiopia	Ethiopia	Ethiopia	19	1	0	1	1	0	4	1	1	Kenya	1999	5	Black African	1	2		Ethiopia	0		5	1	5	4	1					0	1	1			1
T_166	1	3	4	1	1	1	1	0	48	1	1	Liberia	Liberia	Liberia	14	1	0	3	2	0	3	1	1	Ivory Coast	2004	8	Black	1	0		Liberia	1		6	5	5	0	1	1				1	1				1
T_167	1	3	4	1	1	1	1	1	24	1	1	Liberia	Liberia	Liberia	10	0	0	0	1	0	3	1	1	Guinea	2008		Black	0			Liberia	1		3	5	5	0	1			1		1	1				1
T_168	1	3	5	0	1	2	1	1	68	1	1	Ethiopia	Ethiopia	Ethiopia	48	1	0	5	3	1	5	1	0				Black African	1	1	16a and 17e no response He did not pick up the medicine before travel Said it was very expensive	Ethiopia	0		4	3	3	0	1					0	1				1
T_169	1	3	5	1	1	1	1	0	44	1	1	Liberia	Liberia	Liberia	17	1	0	2	2	0	1	0	1	Ivory Coast	2003	10	Black	1	1		Liberia	1		8	1	5	4	1				Sun	1	1				1
T_170	1	3	5	1	1	1	1	1	56	1	1	Sierra Leone	Sierra Leone	Sierra Leone	13	0	0	0	1	0	5	1	1	Guinea	2005	3	African	1	1		Sierra Leone	1		2	5	5	0	1					0	1		1
T_171	1	3	4	0	1	2	1	0	56	1	1	Kenya	Kenya	Kenya	13	1	0	5	3	1	4	1	0				Black	1	1		Kenya	0		6	5	5	0	1					0	1			1	1
T_172	1	3	4	0	1	3	0	1	35	1	0	United States	United States	United States		1	0	5	3	1	5	1	1	Guatemala	2002	1	Caucasian	1	2		Kenya	0		3	3	5	2	1					0	1			1	1
T_173	1	3	5	0	1	3	0	0	89	1	0	United States	United States	United States		1	0	5	3	1	4	1	0				Caucasian	1	1		South Africa	0		4	5	3	-2	1					0	1	1
T_174	1	3	4	0	1	3	0	0	68	1	0	United States	United States	United States		1	0	1	1	0	5	1	0				White	1	4	Didn't answer question #26 because she is undecided about taking malaria medication at this point	South Africa	0		2	3	5	2	1					0	1		1
T_175	1	3	4	1	1	1	1	0	60	1	1	Liberia	Liberia	Liberia	16	1	0	2	2	0	2	0	1	Ivory Coast	2002	3	Black	1	0		Liberia	1		3	3	5	2	1					0	1	1			1
T_176	1	3	5	1	1	1	1	0	32	1	1	Liberia	Liberia	Liberia	11	0	0	0	1	0	3	1	1	Guinea	2003	3	Black African	0			Liberia	1		4	5	5	0	1					0	1	1	1
T_177	1	3	4	1	1	1	1	0	51	1	1	Ghana	Ghana	Ghana	28	1	0	4	2	0	3	1	0				Black	1	0		Ghana	1		2	1	5	4	1					0	1		1	1	1
T_178	1	3	4	0	1	2	1	1	47	1	1	Kenya	Kenya	Kenya	20	1	0	5	3	1	5	1	0				Black African	1	1		Kenya	0		3	5	5	0	1					0	1		1	1	1
T_179	1	3	5	0	1	2	1	0	44	1	1	Kenya	Kenya	Africa	19	1	0	5	3	1	5	1	0				African	1	0		Kenya	0		3	5	5	0	1					0	1		1	1	1
T_180	1	3	4	0	1	2	1	0	22	1	1	Kenya	Kenya	Kenya	19	1	0	5	3	1	4	1	0				Black African	1	0		Kenya	0		2	2	5	3	1					0	1			1	1
T_181	1	3	4	0	1	2	1	1	19	1	0	United States	Kenya	Kenya		1	0	5	3	1	3	1	0				Black	1	1		Kenya	0		3	3	4	1	1					0	1	1			1
T_182	1	3	5	0	1	2	1	0	63	1	1	Uganda	Uganda	Uganda	5	1	0	1	1	0	3	1	0				Black	1	0		Uganda	0		4	1	3	2	1					0	1		1	1	1
T_183	1	3	4	1	1	1	1	0	63	1	1	Liberia	Liberia	Liberia	40	1	0	5	3	1	3	1	0				Black	1	0		Liberia	1		4	2	5	3	1					0	1
T_184	1	3	5	0	1	2	1	1	32	1	1	Somalia	Somalia	Somalia	19	0	0	0	1	0	3	1	1	Kenya Ethopia	1998		Black	1	2		Kenya	0		3	1	3	2	1					0	1	1	1	1
T_185	1	3	5	1	1	1	1	0	24	1	1	Liberia	Liberia	Liberia	10	0	0	0	1	0	3	1	0				Black African American	1	1		Liberia	1		3	4	5	1	1					0	1		1	1	1
T_186	1	3	4	0	1	2	1	0	32	1	1	Somalia	Somalia	Somalia	7	0	0	0	1	0	3	1	0				Black	1	1		Somalia	0		3	5	5	0	1					0	1	1			1
T_187	1	3	4	1	1	1	1	1	44	1	1	Liberia	Liberia	Liberia	13	1	0	5	3	1	5	1	1	Guinea	1997	2	Black	1	1		Liberia	1		2.5	5	5	0	1					0	1		1	1	1
T_188	1	3	5	0	1	2	1	1	50	1	1	Ethiopia	Ethiopia	Ethiopia	13	1	0	1	1	0	2	0	1	Yemen	2005	14	Black African	1	3	Did not answer #4 Said he is 'not sure'	Ethiopia	0		12	5	5	0		1			Dirty areas	1	1
T_189	1	3	5	0	1	2	1	0	43	1	1	Ethiopia	Ethiopia	Ethiopia	13	0	0	0	1	0	2	0	1	Yemen	2005	5	African	1	1		Ethiopia Eritrea	0		12	5	5	0					Flies	1	1
T_190	1	3	5	1	1	1	1	0	48	1	1	Ghana	Ghana	Ghana	20	1	0	3	2	0	3	1	0				Black	1	0		Ghana	1		4	2	4	2	1					0	1		1	1
T_191	1	3	5	1	1	3	0	0	44	1	0	United States	United States	United States		0	0	0	1	0	5	1	0				White	1	1		Sierra Leone	1		2	1	5	4	1					0	1	1			1
T_192	1	3	5	1	1	1	1	1	38	1	1	The Gambia	The Gambia	The Gambia	18	0	0	0	1	0	4	1	0				Black	1	2		The Gambia	1		3	5	4	-1	1					0	1		1
T_193	1	3	5	1	1	1	1	0	42	1	1	Ghana	Ghana	Ghana	12	1	0	1	1	0	3	1	0				Black	1	2		Ghana	1		2	4	5	1	1					0	1	1	1		1
T_194	1	3	5	0	1	2	1	0	27	1	1	Somalia	Somalia	Somalia	12	1	0	1	1	0	3	1	0				Black Somali	1	1		Kenya Somalia	0		12	5	5	0				1		1	1	1	1
T_195	1	3	5	1	1	1	1	1	46	1	1	The Gambia	The Gambia	The Gambia	18	1	0	2	2	0	5	1	0				Black	1	2		The Gambia	1		2.5	5	4	-1	1					0	1		1	1	1
T_196	1	3	5	0	1	2	1	0	32	1	1	Somalia	Somalia	Somalia	11	1	0	1	1	0	0	0	1	Kenya	2006		Black	1	0		Ethiopia	0		12.9	5	5	0	1	1				1	1		1	1	1
T_197	1	3	4	1	1	1	1	1	43	1	1	Sierra Leone	Guinea	Guinea	20	1	0	5	3	1	4	1	1	Guinea	1998	1.25	Black African	1	2		Guinea Sierra Leone	1		3	5	4	-1	1					0	1			1
T_198	1	3	4	1	1	1	1	0	25	1	1	Liberia	Liberia	Liberia	6	1	0	1	1	0	2	0	0				Black	1	0		Liberia	1		5	5	5	0	1					0	1			1
T_199	1	3	4	0	1	2	1	0	34	1	1	Somalia	Somalia	Somalia	23	1	0	1	1	0	5	1	1	Kenya	1996	1	Black Somali	1	0		Somalia Kenya	0		2	2	5	3	1					0	1				1
T_200	1	3	4	0	1	2	1	1	37	1	1	Somalia	Somalia	Somalia	27	0	0	0	1	0	4	1	0				African Somali	1	1	NOTE: He couldn't answer No 4 said he didn't know	Somalia Kenya	0		2	1	5	4	1					0	1	1
T_201	1	3	4	1	1	1	1	0	32	1	1	France	Cameroon	Cameroon	10	0	0	0	1	0	3	1	0				Black African	1	0		Cameroon	1		3	4	4	0	1					0	1			1		1
T_202	1	3	5	0	1	2	1	0	70	1	1	Somalia	Somalia	Somalia	14	1	0	1	1	0	0	0	1	Kenya			Black	1	0		Kenya	0		8	5	5	0	1	1				1	1		1	1
T_203	1	3	5	1	1	1	1	1	38	1						1	0														The Gambia	1		4	3	4	1	1					0	1	1		1
T_204	1	3	5	0	1	2	1		66	1						0	0	0	1	0											South Africa Botswana	0		3	1	5	4	1					0	1				1
T_205	1	3	4	0	1	3	0	1	65	1	0	United States	United States	United States		1	0	1	1	0	5	1	1	Southern Africa	1978	2	White	1	3		South Africa Botswana Zimbabwe	0		3.5	1	4	3	1					0	1			1	1
T_206	1	3	5	0	1	2	1	0	70	1	1	Somalia	Somalia	Somalia	13	1	0	4	2	0	0	0	1	Kenya	2005	12	Black	1	0		Kenya	0		12	5	5	0	1	1	1			1	1	1	1		1
T_207	1	3	5	1	1	1	1	0	37	1	1	Cameroon	Cameroon	Cameroon	11	0	0	0	1	0	3	1	0				African American	1	2		Cameroon	1		2	5	5	0	1					0	1
T_208	1	3	4	0	1	2	1		63	1	1	Ethiopia			36	1	0						1	Djibouti	1982	2.5					Ethiopia	0		4	5	5	0	1					0	1	1
T_209	1	3	4	1	1	1	1	0	32	1	1	Liberia	Liberia	Liberia	7	1	0	2	2	0	5	1	0				Black	1	1		Liberia	1		2	4	5	1	1					0	1		1	1
T_210	1	3	5	1	1	1	1	0	63	1	1	Nigeria	Nigeria	Nigeria	37	1	0	5	3	1	3	1	0				Black African	1	0		Nigeria	1		4	1	3	2	1	1				1	1
T_211	1	3	5	1	1	1	1	1	39	1	1	Liberia	Liberia	Liberia	20	0	0	0	1	0	3	1	1	Sierra Leone Ivory Coast Guinea		0.5	African	0			Liberia	1		6	5	3	-2	1	1	1			1	1	1		1		1
T_212	1	3	5	1	0	3	0	1	35	1	0	United States	United States	United States		0	0	0	1	0	4	1	0				White	1			Senegal Ghana Nigeria South Africa	1		0.29	2	2	0		1				1	1
T_213	1	3	5	0	0	3	0	0	22	1	0	United States	United States	United States		0	0	0	1	0	4	1	0				Caucasian	1	1		Uganda	0		4	1	5	4	1					0	1	1		1
T_214	1	3	5	0	0	3	0	0	66	1	0	United States	United States	United States		1	0	1	1	0	5	1	0				White	1	1		Botswana Zambia Zimbabwe	0		2.5	3	5	2	1					0	1				1
T_215	1	3	5	1	0	3	0	1	72	1	0	United States	United States	United States		1	0	5	3	1	5	1	1	Nicaragua Mexico Equador Panama Costa Rica	1997	8	White	1	0		Ghana	1		3	5	5	0	1					0	1		1		1
T_216	1	3	5	0	0	3	0	0	68	1	0	United States	United States	United States		1	0				5	1	0				White	1	3		Rwanda	0		1	2	2	0	1					0	1				1
T_217	1	3	5	0	1	2	1	0	30	1	1	Ethiopia	Somalia	Somalia	20	1	0	1	1	0	3	1	1	Kenya			Black	1	0		Ethiopia	0		6	5	4	-1	1					0	1				1
T_218	1	3	5	0	1	2	1	0	21	1	0	United States	Egypt	Ethiopia		1	0	5	3	1	3	1	0				Other	1	0		Ethiopia	0		4	3	5	2	1					0	1	1	1	1
T_219	1	3	5	0	0	3	0	1	29	1	0	United States	United States	United States		0	0	0	1	0	4	1	0				Mixed White and Latino	1			Kenya	0		1.5	2	5	3	1				Ingest	1	0
T_220	1	3	5	1	0	3	0	0	46	1	0	United States	United States	United States		0	0	0	2	0	5	1	0				Caucasian	1	2		Sierra Leone	1		1.5	1	5	4	1					0	1		1	1	1
T_221	1	3	5	0	1	2	1	0	32	1	1	Ethiopia	Ethiopia	Ethiopia	12	0	0	0	1	0	1	0	1	Kenya		1	African	1			Ethiopia	0		6		4		1					0	1
T_222	1	3	5	0	0	3	0	1	73	1	0	United States	Ireland	Spain		1	0	5	3	1	5	1	1	Tanzania	2016	0.25	Caucasian	1			Tanzania	0		7	5	5	0	1					0	1			1	1
T_223	1	3	5	0	0	3	0	0	71	1	0	United States	United States	United States		1	0	5	3	1	5	1	1	Tanzania		0.75	Caucasian	1			Tanzania	0		42	3	5	2	1					0	1				1
T_224	1	3	5	0	0	3	0	1	68	1	0	United States	United States	United States		0	0	0	1	0	4	1	0				White	1			The Gambia Zimbabwe Botswana	1		2.5	1	5	4	1					0	1				1
T_225	1	3	5	0	1	2	1	1	26	1	1	Ethiopia	Ethiopia	Ethiopia	22	0	0	0	1	0	3	1	0				Anuwok tribe Ethiopia	1	4		Ethiopia	0		4	3	3	0	1					0	1				1
[truncated: 180 more columns]

## Sheet: Data Dictionary
	Database notes
	All free text fields have been reviewed for PHI. Text is original to participant response except where PHI was censored. All commas were removed.
	Variable Prefix	Survey Site - In which settings the prompt was included
	a_	All survey sites
	noc_	Not a prompt in the community (paper and online) version of the survey. Was a prompt in ED version of the survey.
	nom_	Not a prompt in the malaria case interview version of the survey
	not_	Not a prompt in the travel clinic version of the survey
	noce_	Not a prompt in community or ED version of the survey
	ot_	Only travel clinic. Follow-up post-travel survey
	ctvfr_	Only community and travel clinic VFRs
	Variable	Format	Code	Prompt, Notes
	a_code	Unique ID	Prefix: C_ community E_ ED M_ malaria case T_ travel clinic	Unique, post extraction code.
	a_eligible	Numerical binary	1 Yes 0 No	Does participant fulfill all eligibility requirements? Only those eligible are included in the dataset.
	a_setting	Numerical categorical	1 Malaria cases 2 Community 3 Travel clinic	In which setting was the participant surveyed?
	a_subset	Numerical categorical	1 Paper - Community 2 Online - Community 3 ED - Community 4 Travel clinic - post travel survey complete 5 Travel clinic - post travel survey incomplete 6 2016 - Malaria case 7 2017 - Malaria case 8 2018 - Malaria case	What is the subsetting where the participant was surveyed?
	a_w_af	Numerical binary	1 Yes 0 No	Is the traveler going to a West African country - As defined by the regions in the Global Burden of Disease Study?
	a_vfr_reason	Numerical binary	1 Yes 0 No	Does the respondent report a travel reason as visiting friends or relatives? This response is self-reported and does not suggest the traveler meets the CDC/study definition of being a VFR traveler.
	a_vfr_def	Numerical categorical	1 West VFR 2 SSA VFR 3 Other Traveler - Non-VFR	Is the respondent a VFR traveler as defined by the study? Using CDC definition of VFR traveler.
	a_vfr_bin	Numerical binary	1 Yes 0 No	Binary VFR traveler or not (condensing a_vfr_def categories 1 and 2)
	a_male	Numerical binary	1 Male 0 Female	Self reported. Gender.
	a_age	Numerical continuous	Integer	Self reported. Age in years.
	a_adult	Numerical binary	1 Yes 0 No	Is the respondent 18 years of age or older?
	a_for_born	Numerical binary	1 Yes 0 No	Self reported. Was the participant born outside the United States?
	a_pob	Categorical	Short text	Respondent's country of birth
	a_mom_pob	Categorical	Short text	Mother's place of birth
	a_dad_pob	Categorical	Short text	Father's place of birth
	a_residency_us	Numerical continuous	Number of years	Years of residency in the United States. Responses only among those who are foreign born.
	a_has_traveled	Numerical binary	1 Yes 0 No	Respondent has traveled from the US to SSA in the past 10 years.
	a_has_traveled_nofortravelclinic	Numerical binary	1 Yes 0 No	Respondent has traveled from the US to SSA in the past 10 years. All respondents from the travel clinic are coded as no, regardless of past travel to delineate past / present tense of certain survey questions.
	a_trip_count_zeros	Numerical categorical	0 is taking first trip 1 has taken 1 trip 2 has taken 2 trips 3 has taken 3 trips 4 has taken 4 trips 5 has taken 5 or more trips	Since living in the United States, how many times have you traveled to places with malaria/ Africa? Respondents who have not yet traveled and are reporting on future first trip are '0'. Respondents who did not answer the question are blank.
	a_trip_cat	Numerical categorical	1 Is taking first / has taken 1 2 2 to 4 3 5 or more	Condensing a_trip_count_zeros into three groups.
	a_trip_bin	Numerical categorical	1 5 or more 0 Less than 5 trips	Binary of a_trip_count_zeros for frequent travel.
	a_education	Numerical categorical	0 grade school 1 some high school 2 high school 3 some college 4 bachelors degree 5 graduate school	What is the highest level of education you completed?
	a_edu_gths	Numerical binary	1 Education greater than high school 0 High school education or less	Binary of a_education at greater than high school threshold
	noc_live_elsewhere	Numerical binary	1 Yes 0 No	Have you ever lived in a country other than the United States or the country you were born?
	noc_live_elsewhere_loc	Free text	Short text	Location for noc_live_elsewhere
	noc_elsewhere_when	Numerical continuous	Year	For noc_live_elsewhere, when did you last live there?
	noc_elsewhere_length	Numerical continuous	Years	For noc_live_elsewhere, how long did you live there?
	noc_ethnicity	Free text	Short text	How would you describe your race/ethnicity?
	noc_pcp	Numerical binary	1 Yes 0 No	Primary care doctors are doctors you go to for checkups and health problems that aren’t emergencies. Do you go to a primary care doctor?
	noc_pcp_last	Numerical categorical	0 Within the last month 1 Within the last 6 months 2 Within the last year 3 1-2 years 4 More than 2 years ago	If yes, when is the last time you went to your primary care doctor?
	noc_notes	Free text	Long text	Additional notes by interviewer or respondent regarding responses
	a_destination	Free text	Short text	What country(ies) did you travel to? / What country(ies) will you travel to? Country. Contains multiple countries for some respondents.
	a_destination_wa	Numerical binary	1 Yes 0 No	Respondent reported a destination in West Africa.
	a_travel_yr	Numerical continuous	Year	When was the last time you traveled to SSA? Blank for those responding to planned travel in the next one year.
	a_duration	Numerical continuous	Weeks	How long were you on your trip? / How long will you be on your trip?
	a_concern	Likert scale	1 Not true 2 3 Somewhat true 4 5 Very true / always true	How true are the following statements? I am concerned for myself about getting malaria when traveling.
	a_deadly	Likert scale	1 Not true 2 3 Somewhat true 4 5 Very true / always true	How true are the following statements? Malaria can be a deadly disease.
	a_deadlyminusconcern	Numerical limited range integer	Range from -4 to +4	Difference between respondent's score for a_deadly and a_concern
	a_contract_mosq	Numerical singular	1 listed response [Blank] did not list response	How do people get malaria? Response: from mosquitos
	a_contract_water	Numerical singular	1 listed response [Blank] did not list response	How do people get malaria? Response: from drinking water
	a_contract_air	Numerical singular	1 listed response [Blank] did not list response	How do people get malaria? Response: from bad air
	a_contract_person	Numerical singular	1 listed response [Blank] did not list response	How do people get malaria? Response: from another person
	a_contract_other	Free text	Long text	How do people get malaria? Response: other free text response
	a_contract_wrong	Numerical binary	1 Yes 0 No	Provided an incorrect method of contracting malaria. Blank means respondent did not provide a response to the question.
	a_preventable	Numerical binary	1 Yes 0 No	Can you prevent malaria?
	a_prev_shot	Numerical singular	1 listed response [Blank] did not list response	If a_preventable is Yes, how can you prevent malaria? Response: immunizations/shots
	a_prev_repellent	Numerical singular	1 listed response [Blank] did not list response	If a_preventable is Yes, how can you prevent malaria? Response: repellent
	a_prev_nets	Numerical singular	1 listed response [Blank] did not list response	If a_preventable is Yes, how can you prevent malaria? Response: bed nets
	a_prev_meds	Numerical singular	1 listed response [Blank] did not list response	If a_preventable is Yes, how can you prevent malaria? Response: taking medications
	a_prev_avoidbite	Numerical singular	1 listed response [Blank] did not list response	If a_preventable is Yes, how can you prevent malaria? Response: avoid mosquito bites
	a_prev_clothing	Numerical singular	1 listed response [Blank] did not list response	If a_preventable is Yes, how can you prevent malaria? Response: wear long clothing
	a_prev_water_envrt	Numerical singular	1 listed response [Blank] did not list response	If a_preventable is Yes, how can you prevent malaria? Response: cleaning up water in environment
	a_prev_wrong	Numerical binary	1 Yes 0 No	Provided an incorrect method of preventing malaria. Blank means respondent did not provide a response to the question.
	a_prev_other	Free text	Long text	If a_preventable is Yes, how can you prevent malaria? Response: other free text response
	noc_you_v_child	Numerical categorical	0 You / adult 1 Child 2 Equally likely	When traveling to areas with malaria, who is more likely to become sick from malaria – you or your child?
	noc_p2p	Numerical binary	1 Yes 0 No	Can people catch malaria directly from another person who is sick with malaria? Directly means spreading from one person right to another.
	a_hx_malaria	Numerical binary	1 Yes 0 No	Have you ever had malaria? (In the past before the current illness for case respondents)
	a_reason_VFR	Numerical singular	1 listed response [Blank] did not list response	What were the main reasons for your travel? / What are the main reasons you are going to travel? Response: listed to visit friends and relatives
	a_reason_business	Numerical singular	1 listed response [Blank] did not list response	What were the main reasons for your travel? / What are the main reasons you are going to travel? Response: listed business
	a_reason_vacation	Numerical singular	1 listed response [Blank] did not list response	What were the main reasons for your travel? / What are the main reasons you are going to travel? Response: listed vacation - not visiting friends or relatives
	a_reason_study	Numerical singular	1 listed response [Blank] did not list response	What were the main reasons for your travel? / What are the main reasons you are going to travel? Response: listed studying abroad / research
	a_reason_mission	Numerical singular	1 listed response [Blank] did not list response	What were the main reasons for your travel? / What are the main reasons you are going to travel? Response: listed mission trip
	a_reason_other	Free text	Long text	What were the main reasons for your travel? / What are the main reasons you are going to travel? Response: listed other response
	not_talk_malaria	Numerical binary	1 Yes 0 No	Did you talk to someone about malaria before you left? / Will you talk with someone about malaria before you go?
	not_talk_malaria_family	Numerical singular	1 listed response [Blank] did not list response	If not_talk_malaria is yes, who did you talk to? / Who will you talk to? Response: family member or friend
	not_talk_malaria_travelagent	Numerical singular	1 listed response [Blank] did not list response	If not_talk_malaria is yes, who did you talk to? / Who will you talk to? Response: travel agent
	not_talk_malaria_other	Free text	Long text	If not_talk_malaria is yes, who did you talk to? / Who will you talk to? Response: other person
	a_see_hcp	Numerical binary	1 Yes 0 No	Did you see a healthcare provider before you left? / Do you plan to see a healthcare provider before you go? All travel clinic respondents coded automatically as yes.
	a_hcp_travel	Numerical singular	1 listed response [Blank] did not list response	If a_see_hcp is yes, Was / Is it your regular healthcare provider, travel clinic, or somewhere else? Response: travel clinic. All travel clinic respondents coded automatically as yes
	not_see_hcp	Numerical binary	1 Yes 0 No	Did you see a healthcare provider before you left? / Do you plan to see a healthcare provider before you go? Same as a_see_hcp except travel clinic respondents are blank
	not_hcp_travel	Numerical singular	1 listed response [Blank] did not list response	If not_see_hcp is yes, Was / Is it your regular healthcare provider, travel clinic, or somewhere else? Response: travel clinic.
	not_hcp_pcp	Numerical singular	1 listed response [Blank] did not list response	If not_see_hcp is yes, Was / Is it your regular healthcare provider, travel clinic, or somewhere else? Response: primary care provider
	not_hcp_both	Numerical singular	1 listed response [Blank] did not list response	If not_see_hcp is yes, Was / Is it your regular healthcare provider, travel clinic, or somewhere else? Response: both travel clinic and primary care provider
	not_hcp_travel_notME	Numerical singular	1 listed response [Blank] did not list response	If not_see_hcp is yes, Was / Is it your regular healthcare provider, travel clinic, or somewhere else? Response: travel clinic. Not mutually exclusive with not_hcp_pcp_notME
	not_hcp_pcp_notME	Numerical singular	1 listed response [Blank] did not list response	If not_see_hcp is yes, Was / Is it your regular healthcare provider, travel clinic, or somewhere else? Response: primary care provider. Not mutually exclusive with not_hcp_travel_notME
	not_hcp_other	Free text	Long text	If not_see_hcp is yes, Was / Is it your regular healthcare provider, travel clinic, or somewhere else? Response: other health care provider
	not_hcp_whynot_unnecessary	Numerical singular	1 listed response [Blank] did not list response	If not_see_hcp is no, why not? Response: seeing a health care provider is unnecessary.
	not_hcp_whynot_notime	Numerical singular	1 listed response [Blank] did not list response	If not_see_hcp is no, why not? Response: no time to seek care
	not_hcp_whynot_vaccinated	Numerical singular	1 listed response [Blank] did not list response	If not_see_hcp is no, why not? Response: I am vaccinated
	not_hcp_whynot_inaccessible	Numerical singular	1 listed response [Blank] did not list response	If not_see_hcp is no, why not? Response: not able to access care
	not_hcp_whynot_uninsured	Numerical singular	1 listed response [Blank] did not list response	If not_see_hcp is no, why not? Response: no insurance
	not_hcp_whynot_didntknowto	Numerical singular	1 listed response [Blank] did not list response	If not_see_hcp is no, why not? Response: didn't know I should seek pre-travel care
	not_hcp_whynot_hcincountry	Numerical singular	1 listed response [Blank] did not list response	If not_see_hcp is no, why not? Response: would see a healthcare provider in country upon arrival
	not_hcp_whynot_cost	Numerical singular	1 listed response [Blank] did not list response	If not_see_hcp is no, why not? Response: seeing a health care provider is too expensive
	not_hcp_whynot_system	Numerical singular	1 systems barrier was listed [Blank] did not list response	The not_hcp_whynot reason(s) listed above were related to barriers in the health system.
	not_hcp_whynot	Free text	Long text	Free text reason listed why respondent did not see a healthcare provider prior to travel
	a_prevent_nets	Numerical binary	1 Yes 0 No	During your most recent trip did you use any of the following strategies to keep mosquitos away or stay healthy? / Do you plan to use any of the following strategies to keep mosquitos away or stay healthy? Strategy: bed nets
	a_prevent_repellent	Numerical binary	1 Yes / Sometimes 0 No	During your most recent trip did you use any of the following strategies to keep mosquitos away or stay healthy? / Do you plan to use any of the following strategies to keep mosquitos away or stay healthy? Strategy: repellent / creams / lotions
	a_prevent_coil	Numerical binary	1 Yes / Sometimes 0 No	During your most recent trip did you use any of the following strategies to keep mosquitos away or stay healthy? / Do you plan to use any of the following strategies to keep mosquitos away or stay healthy? Strategy: mosquito coils
	a_prevent_indoors	Numerical binary	1 Yes / Sometimes 0 No	During your most recent trip did you use any of the following strategies to keep mosquitos away or stay healthy? / Do you plan to use any of the following strategies to keep mosquitos away or stay healthy? Strategy: staying indoors when mosquitoes are out
	a_prevent_clothes	Numerical binary	1 Yes / Sometimes 0 No	During your most recent trip did you use any of the following strategies to keep mosquitos away or stay healthy? / Do you plan to use any of the following strategies to keep mosquitos away or stay healthy? Strategy: wearing long clothing
	a_prevent_edu	Numerical binary	1 Yes / Sometimes 0 No	During your most recent trip did you use any of the following strategies to keep mosquitos away or stay healthy? / Do you plan to use any of the following strategies to keep mosquitos away or stay healthy? Strategy: educate yourself on the risks of malaria before traveling
	a_prevent_lodging	Numerical binary	1 Yes / Sometimes 0 No	During your most recent trip did you use any of the following strategies to keep mosquitos away or stay healthy? / Do you plan to use any of the following strategies to keep mosquitos away or stay healthy? Strategy: pick where you stay in order to avoid mosquitoes (AC/screens)
	noc_prevent_envrt	Numerical binary	1 Yes / Sometimes 0 No	During your most recent trip did you use any of the following strategies to keep mosquitos away or stay healthy? / Do you plan to use any of the following strategies to keep mosquitos away or stay healthy? Strategy: environmental cleanup, i.e., removing sources of standing water
	noc_prevent_food	Numerical binary	1 Yes / Sometimes 0 No	During your most recent trip did you use any of the following strategies to keep mosquitos away or stay healthy? / Do you plan to use any of the following strategies to keep mosquitos away or stay healthy? Strategy: practice good food safety / hygiene
	noc_prevent_water	Numerical binary	1 Yes / Sometimes 0 No	During your most recent trip did you use any of the following strategies to keep mosquitos away or stay healthy? / Do you plan to use any of the following strategies to keep mosquitos away or stay healthy? Strategy: ensure clean water source (safe, bottled)
	noc_prevent_vaccine	Numerical binary	1 Yes / Sometimes 0 No	During your most recent trip did you use any of the following strategies to keep mosquitos away or stay healthy? / Do you plan to use any of the following strategies to keep mosquitos away or stay healthy? Strategy: get vaccinations
	noce_prevent_other	Free text	Long text	Anything else? Other strategies provided freely by respondent.
	a_take_antimalarial	Numerical binary	1 Yes / Sometimes 0 No	Did you take a malaria prevention medicine during your last trip? Only for those who have traveled, did they actually take an antimalarial
	a_finish_antimalarial	Numerical binary	1 Yes 0 No	Did you finish taking the medicine after you got back?
	nom_malaria_during_travel	Numerical binary	1 Yes 0 No	Since living in the United States, do you think you have gotten malaria while traveling outside of the US?
	nom_malaria_see_hcp	Numerical binary	1 Yes 0 No	If nom_malaria_during_travel is yes, did you end up seeing a healthcare provider when you thought you had malaria?
	nom_malaria_see_hcp_why	Free text	Long text	What made you decide to go?
	nom_malaria_tested	Numerical binary	1 Yes 0 No	Were you tested for malaria?
	nom_malaria_dx	Numerical categorical	0 No 1 Yes 2 Don't recall	Did a healthcare provider tell you that you had malaria?
	a_malaria_hccount	Numerical categorical	1 One / told on first visit 2 Two times 3 Three times 4 Four or more	How many times did you see a healthcare provider before you were told you had malaria?
	a_malaria_selftreat	Numerical binary	1 Yes 0 No	Did you try to treat yourself before seeking medical care?
	a_malaria_otherinfo	Free text	Long text	Other information recorded by interviewer or respondent about their malaria illness.
	nom_hypothetical	Numerical binary	0 Would go to the doctor right away 1 I would try to treat at home first	Imagine you just got back to the United States from a trip to [country of travel] and started to feel symptoms of malaria such as fever and chills. Would you go to the doctor right away or try to treat it yourself at home first?
	a_hypothetical	Numerical binary	0 Would / did go to the doctor right away 1 I would try / I did try to treat at home first	nom_hypothetical, except for malaria cases, includes their actual report of treating at home or going to the doctor right away
	nom_hyp_doc_dangerous	Numerical singular	1 listed response [Blank] did not list response	If nom_hypothetical is 0, why would you go to the doctor right away? Response: malaria is dangerous / serious
	nom_hyp_doc_treatment	Numerical singular	1 listed response [Blank] did not list response	If nom_hypothetical is 0, why would you go to the doctor right away? Response: doctors can prescribe antimalarial medicines
	nom_hyp_doc_contagious	Numerical singular	1 listed response [Blank] did not list response	If nom_hypothetical is 0, why would you go to the doctor right away? Response: I might be contagious
	nom_hyp_doc_other	Free text	Long text	If nom_hypothetical is 0, why would you go to the doctor right away? Response: other or full detail response
	a_hyp_home_easyhavemed	Numerical singular	1 listed response [Blank] did not list response	If nom_hypothetical is 1, why would you try and treat at home first? Response: Malaria is easy to treat / I already have the medicine
	a_hyp_home_notserious	Numerical singular	1 listed response [Blank] did not list response	If nom_hypothetical is 1, why would you try and treat at home first? Response: Malaria is not a serious problem
	a_hyp_home_expensive	Numerical singular	1 listed response [Blank] did not list response	If nom_hypothetical is 1, why would you try and treat at home first? Response: Going to the doctor is too expensive
	a_hyp_home_docunknowledgable	Numerical singular	1 listed response [Blank] did not list response	If nom_hypothetical is 1, why would you try and treat at home first? Response: Doctors in the US don't know about malaria
	a_hyp_home_quarantine	Numerical singular	1 listed response [Blank] did not list response	If nom_hypothetical is 1, why would you try and treat at home first? Response: Doctors in the US would treat me bad / fear of being quarantined
	a_hyp_home_waitsee	Numerical singular	1 listed response [Blank] did not list response	If nom_hypothetical is 1, why would you try and treat at home first? Response: Would wait and see if symptoms get worse
	a_hyp_home_other	Free text	Long text	If nom_hypothetical is 1, why would you try and treat at home first? Response: other or full detail response
	a_hcp_concerns	Numerical binary	1 Yes 0 No	Do you have any concerns about seeing a healthcare provider if you had malaria symptoms?
	a_hcp_concerns_docunknowledgeable	Numerical singular	1 listed response [Blank] did not list response	If a_hcp_concerns is yes, please explain. Response: doctors are unknowledgeable about malaria
	a_hcp_concerns_quarantine	Numerical singular	1 listed response [Blank] did not list response	If a_hcp_concerns is yes, please explain. Response: fear being quarantined
	a_hcp_concerns_costinsurance	Numerical singular	1 listed response [Blank] did not list response	If a_hcp_concerns is yes, please explain. Response: concerned about the cost of treatment / don't have insurance
	a_hcp_concerns_text	Free text	Long text	If a_hcp_concerns is yes, please explain. Response: other or full detail response
	a_advice	Numerical binary	1 Yes 0 No	If you traveled again to [country] will you seek advice on your health?
	a_advice_internet	Numerical singular	1 listed response [Blank] did not list response	If you traveled again to [country], where would you seek advice on your health? Response: internet
	a_advice_travelagent	Numerical singular	1 listed response [Blank] did not list response	If you traveled again to [country], where would you seek advice on your health? Response: travel agent
	a_advice_pharmacy	Numerical singular	1 listed response [Blank] did not list response	If you traveled again to [country], where would you seek advice on your health? Response: pharmacy
	a_advice_uc	Numerical singular	1 listed response [Blank] did not list response	If you traveled again to [country], where would you seek advice on your health? Response: urgent care
	a_advice_pcp	Numerical singular	1 listed response [Blank] did not list response	If you traveled again to [country], where would you seek advice on your health? Response: primary care
	a_advice_travelclinic	Numerical singular	1 listed response [Blank] did not list response	If you traveled again to [country], where would you seek advice on your health? Response: travel clinic
	a_advice_friendsfam	Numerical singular	1 listed response [Blank] did not list response	If you traveled again to [country], where would you seek advice on your health? Response: friends and family
	a_advice_mdhcdcembassy	Numerical singular	1 listed response [Blank] did not list response	If you traveled again to [country], where would you seek advice on your health? Response: MDH/ CDC/ Embassy
	a_advice_other	Free text	Long text	If you traveled again to [country], where would you seek advice on your health? Response: other or full free text response
	a_advice_none_why	Free text	Long text	If a_advice is no, why wouldn't you seek advice on your health?
	a_take_recc_med	Numerical binary	1 Yes 0 No	The next time you travel to [country], will you take a malaria prevention medication if recommended?
	a_traveled_antimalarial	Numerical binary	1 Yes 0 No	Did you take a malaria prevention medicine during your last trip? If the respondent has not yet traveled, response is planned use of antimalarial in response to prompt: "Do you plan to take an antimalarial if recommended?"
	a_notake_recc_med_expensive	Numerical singular	1 listed response [Blank] did not list response	If a_take_recc_med is no, why not? Response: medicine is too expensive
	a_notake_recc_med_notserious	Numerical singular	1 listed response [Blank] did not list response	If a_take_recc_med is no, why not? Response: malaria is not serious
	a_notake_recc_med_wontneedit	Numerical singular	1 listed response [Blank] did not list response	If a_take_recc_med is no, why not? Response: I won't need it
	a_notake_recc_med_dontliketakingmeds	Numerical singular	1 listed response [Blank] did not list response	If a_take_recc_med is no, why not? Response: I don't like taking medications
	a_notake_recc_med_notrainyseason	Numerical singular	1 listed response [Blank] did not list response	If a_take_recc_med is no, why not? Response: It won't be the rainy season when I travel
	a_notake_recc_med_nomalariaatdestination	Numerical singular	1 listed response [Blank] did not list response	If a_take_recc_med is no, why not? Response: There is no malaria at my destination
	a_notake_recc_med_getatdestination	Numerical singular	1 listed response [Blank] did not list response	If a_take_recc_med is no, why not? Response: I will get the medication when I arrive to my destination
	a_notake_recc_med_sideeffects	Numerical singular	1 listed response [Blank] did not list response	If a_take_recc_med is no, why not? Response: Medications have side effects
	a_notake_recc_med_easiertotreat	Numerical singular	1 listed response [Blank] did not list response	If a_take_recc_med is no, why not? Response: Easier to treat malaria than prevent
	a_notake_recc_med_text	Free text	Long text	If a_take_recc_med is no, why not? Response: original full response or other reason
	a_edu_approaca_hcp	Numerical singular	1 listed response [Blank] did not list response	In your opinion, what would be the best way to educate people about malaria? Response is an approach: health care providers
	a_edu_approaca_pharm	Numerical singular	1 listed response [Blank] did not list response	In your opinion, what would be the best way to educate people about malaria? Response is an approach: pharmacy
	a_edu_approaca_socialmedia	Numerical singular	1 listed response [Blank] did not list response	In your opinion, what would be the best way to educate people about malaria? Response is an approach: social media
	a_edu_approaca_appsvideo	Numerical singular	1 listed response [Blank] did not list response	In your opinion, what would be the best way to educate people about malaria? Response is an approach: using apps or videos
	a_edu_approaca_websites	Numerical singular	1 listed response [Blank] did not list response	In your opinion, what would be the best way to educate people about malaria? Response is an approach: using websites
	a_edu_approaca_tradmedia	Numerical singular	1 listed response [Blank] did not list response	In your opinion, what would be the best way to educate people about malaria? Response is an approach: using traditional media sources
	a_edu_approaca_phone	Numerical singular	1 listed response [Blank] did not list response	In your opinion, what would be the best way to educate people about malaria? Response is an approach: phone calls
	a_edu_approaca_airline	Numerical singular	1 listed response [Blank] did not list response	In your opinion, what would be the best way to educate people about malaria? Response is an approach: the airlines
	a_edu_approaca_travagent	Numerical singular	1 listed response [Blank] did not list response	In your opinion, what would be the best way to educate people about malaria? Response is an approach: travel agents
	a_edu_approaca_govtembassy	Numerical singular	1 listed response [Blank] did not list response	In your opinion, what would be the best way to educate people about malaria? Response is an approach: governments or embassies
	a_edu_approaca_fliersmaterials	Numerical singular	1 listed response [Blank] did not list response	In your opinion, what would be the best way to educate people about malaria? Response is an approach: using fliers or materials
	a_edu_approaca_communityengage	Numerical singular	1 listed response [Blank] did not list response	In your opinion, what would be the best way to educate people about malaria? Response is an approach: using community engagement
	a_edu_approaca_wordofmouth	Numerical singular	1 listed response [Blank] did not list response	In your opinion, what would be the best way to educate people about malaria? Response is an approach: through word of mouth
	a_edu_approaca_wontworkalreadyknowirrelevant	Numerical singular	1 listed response [Blank] did not list response	In your opinion, what would be the best way to educate people about malaria? Response is: education won't work because people already know or the information is irrelevant
	a_edu_approaca_provideredu	Numerical singular	1 listed response [Blank] did not list response	In your opinion, what would be the best way to educate people about malaria? Response is an approach: better educate health care providers
	a_edu_approaca_require	Numerical singular	1 listed response [Blank] did not list response	In your opinion, what would be the best way to educate people about malaria? Response is an approach: require malaria prevention in travelers
	a_edu_approaca_story	Numerical singular	1 listed response [Blank] did not list response	In your opinion, what would be the best way to educate people about malaria? Response is an approach: storytelling
	a_edu_message_seedocandlisten	Numerical singular	1 listed response [Blank] did not list response	In your opinion, what would be the best way to educate people about malaria? Response is a message: see health care provider and listen to their recommendations
	a_edu_message_prevent	Numerical singular	1 listed response [Blank] did not list response	In your opinion, what would be the best way to educate people about malaria? Response is a message: tell people how to prevent malaria
	a_edu_message_symptoms	Numerical singular	1 listed response [Blank] did not list response	In your opinion, what would be the best way to educate people about malaria? Response is a message: tell people the symptoms of malaria
	a_edu_message_severity	Numerical singular	1 listed response [Blank] did not list response	In your opinion, what would be the best way to educate people about malaria? Response is a message: tell people about the severity of malaria
	a_edu_message_takeanimal	Numerical singular	1 listed response [Blank] did not list response	In your opinion, what would be the best way to educate people about malaria? Response is a message: tell people to take antimalarials
	a_edu_message_generaltravelhealth	Numerical singular	1 listed response [Blank] did not list response	In your opinion, what would be the best way to educate people about malaria? Response is a message: give people general traveler health advice
	a_edu_message_whereendemic	Numerical singular	1 listed response [Blank] did not list response	In your opinion, what would be the best way to educate people about malaria? Response is a message: tell people where malaria is endemic
	a_edu_message_seekcareifsick	Numerical singular	1 listed response [Blank] did not list response	In your opinion, what would be the best way to educate people about malaria? Response is a message: tell people to seek care if they have malaria symptoms
	a_edu_message_costsupportaccessresources	Numerical singular	1 listed response [Blank] did not list response	In your opinion, what would be the best way to educate people about malaria? Response is a message: tell people how to reduce barriers to prevention around cost, support, access to health care and resources
	a_edu_message_stigma	Numerical singular	1 listed response [Blank] did not list response	In your opinion, what would be the best way to educate people about malaria? Response is a message: reduce stigma in messaging
	a_educate	Free text	Long text	Original full text response to: In your opinion, what would be the best way to educate people about malaria?
	ot_plan_take_antimalarial	Numerical binary	1=Yes 0=No	Do you plan to take a medication to prevent malaria if the doctor prescribes it for your upcoming trip?
	ot_antimal_taken	Numerical binary	1=Yes 0=No	Did you take a malaria prevention medicine during your last trip?
	ot_dif_antimalarial	Numerical categorical	Plan to, did=0 Plan to, didn't=1 Didn't plan to, did=-1 Didn't plan to, didn't=2	Differential between respondent's reported planned use and actual reported use of antimalarials
	ot_prevented_nets	Numerical binary	1=Yes / Sometimes 0=No	During your most recent trip did you use any of the following strategies to keep mosquitos away or stay healthy? Strategy: bed nets
	ot_prevented_repellent	Numerical binary	1=Yes / Sometimes 0=No	During your most recent trip did you use any of the following strategies to keep mosquitos away or stay healthy? Strategy: repellent
	ot_prevented_coil	Numerical binary	1=Yes / Sometimes 0=No	During your most recent trip did you use any of the following strategies to keep mosquitos away or stay healthy? Strategy: mosquito coil
	ot_prevented_indoors	Numerical binary	1=Yes / Sometimes 0=No	During your most recent trip did you use any of the following strategies to keep mosquitos away or stay healthy? Strategy: staying indoors when mosquitos were out
	ot_prevented_clothes	Numerical binary	1=Yes / Sometimes 0=No	During your most recent trip did you use any of the following strategies to keep mosquitos away or stay healthy? Strategy: wearing long clothing
	ot_prevented_edu	Numerical binary	1=Yes / Sometimes 0=No	During your most recent trip did you use any of the following strategies to keep mosquitos away or stay healthy? Strategy: educating yourself on risks of malaria before traveling
	ot_prevented_lodging	Numerical binary	1=Yes / Sometimes 0=No	During your most recent trip did you use any of the following strategies to keep mosquitos away or stay healthy? Strategy: pick where you stayed in order to avoid mosquitos (AC/screens)
	ot_prevented_envrt	Numerical binary	1=Yes / Sometimes 0=No	During your most recent trip did you use any of the following strategies to keep mosquitos away or stay healthy? Strategy: environmental cleanup
	ot_prevented_food	Numerical binary	1=Yes / Sometimes 0=No	During your most recent trip did you use any of the following strategies to keep mosquitos away or stay healthy? Strategy: practice good food safety / hygiene
	ot_prevented_water	Numerical binary	1=Yes / Sometimes 0=No	During your most recent trip did you use any of the following strategies to keep mosquitos away or stay healthy? Strategy: ensure clean source of water
	ot_prevented_vaccine	Numerical binary	1=Yes / Sometimes 0=No	During your most recent trip did you use any of the following strategies to keep mosquitos away or stay healthy? Strategy: got vaccinations
	ot_dif_nets	Numerical categorical	Plan to, did=0 Plan to, didn't=1 Didn't plan to, did=-1 Didn't plan to, didn't=2	Differential between respondent's reported planned use and actual reported use of bed nets
	ot_dif_repellent	Numerical categorical	Plan to, did=0 Plan to, didn't=1 Didn't plan to, did=-1 Didn't plan to, didn't=2	Differential between respondent's reported planned use and actual reported use of mosquito repellent
	ot_dif_coil	Numerical categorical	Plan to, did=0 Plan to, didn't=1 Didn't plan to, did=-1 Didn't plan to, didn't=2	Differential between respondent's reported planned use and actual reported use of mosquito coils
	ot_dif_indoors	Numerical categorical	Plan to, did=0 Plan to, didn't=1 Didn't plan to, did=-1 Didn't plan to, didn't=2	Differential between respondent's reported planned use and actual reported use of staying indoors when mosquitos were out
	ot_dif_clothes	Numerical categorical	Plan to, did=0 Plan to, didn't=1 Didn't plan to, did=-1 Didn't plan to, didn't=2	Differential between respondent's reported planned use and actual reported use of long clothing
	ot_dif_edu	Numerical categorical	Plan to, did=0 Plan to, didn't=1 Didn't plan to, did=-1 Didn't plan to, didn't=2	Differential between respondent's reported planned use and actual reported use of educating themselves about malaria prevention
	ot_dif_lodging	Numerical categorical	Plan to, did=0 Plan to, didn't=1 Didn't plan to, did=-1 Didn't plan to, didn't=2	Differential between respondent's reported planned use and actual reported use of choosing where to stay in order to avoid mosquitos
	ot_dif_envrt	Numerical categorical	Plan to, did=0 Plan to, didn't=1 Didn't plan to, did=-1 Didn't plan to, didn't=2	Differential between respondent's reported planned use and actual reported use of environmental cleanup
	ot_dif_food	Numerical categorical	Plan to, did=0 Plan to, didn't=1 Didn't plan to, did=-1 Didn't plan to, didn't=2	Differential between respondent's reported planned use and actual reported use of practice good food safety / hygiene
	ot_dif_water	Numerical categorical	Plan to, did=0 Plan to, didn't=1 Didn't plan to, did=-1 Didn't plan to, didn't=2	Differential between respondent's reported planned use and actual reported use of ensuring clean water source
	ot_dif_vaccine	Numerical categorical	Plan to, did=0 Plan to, didn't=1 Didn't plan to, did=-1 Didn't plan to, didn't=2	Differential between respondent's reported planned use and actual reported use of getting vaccinations
	ot_antimal_completed	Numerical binary	1=Yes 0=No	If ot_antimal_taken is yes, Did you finish taking the medicine after you got back?
	ot_prescrip_made	Numerical binary	1=Yes 0=No	Did a healthcare provider write you a prescription for a malaria prevention medicine?
	ot_prescrip_pickup	Numerical binary	0 Picked up medicine in the US 1 Picked up medicine in destination country	Did you pick up the medicine in the US or once you arrived to your destination?
	ot_children_traveled	Numerical binary	1=Yes 0=No	On your last trip did any children travel with you?
	ot_child_taken_antim	Numerical binary	1=Yes 0=No	If ot_children_traveled is yes, did the child/ren take a malaria prevention medicine during your last trip?
	ot_child_med_complete	Numerical binary	1=Yes 0=No	Did the child finish taking the medicine after he/she got back?
	ot_child_prescribed	Numerical binary	1=Yes 0=No	Did a healthcare provider write your child/children a prescription for malaria prevention medicine?
	ot_child_pickup_where	Numerical binary	0 Picked up medicine in the US 1 Picked up medicine in destination country	Did you pick up the medicine for your child/ren in the US or once you arrived to your destination?
	ot_fever	Numerical binary	1=Yes 0=No	Did you experience any of the following health issues during your last trip? Issue: fever
	ot_headache	Numerical binary	1=Yes 0=No	Did you experience any of the following health issues during your last trip? Issue: headache
	ot_bodyache	Numerical binary	1=Yes 0=No	Did you experience any of the following health issues during your last trip? Issue: body ache
	ot_diarrhea	Numerical binary	1=Yes 0=No	Did you experience any of the following health issues during your last trip? Issue: diarrhea
	ot_nausea	Numerical binary	1=Yes 0=No	Did you experience any of the following health issues during your last trip? Issue: nausea
	ot_vomiting	Numerical binary	1=Yes 0=No	Did you experience any of the following health issues during your last trip? Issue: vomiting
	ot_mosq_bite	Numerical binary	1=Yes 0=No	Did you experience any of the following health issues during your last trip? Issue: mosquito bites
	ot_heat_distress	Numerical binary	1=Yes 0=No	Did you experience any of the following health issues during your last trip? Issue: health distress
	ot_hospital_travel	Numerical binary	1=Yes 0=No	Did you experience any of the following health issues during your last trip? Issue: While you were in [country] did you go to the hospital or a clinic for any personal health issues?
	ot_hospital_domestic	Numerical binary	1=Yes 0=No	Did you experience any of the following health issues during your last trip? Issue: After you returned to the United States, did you go to the hospital or a clinic for health issues that could have been caused by your travel?
	ot_cotravel_hospital	Numerical binary	1=Yes 0=No	Did you experience any of the following health issues during your last trip? Issue: Did anyone travelling with you go to the hospital or a clinic for any health issues while you were travelling?
	ot_cotravel_hosp_domestic	Numerical binary	1=Yes 0=No	Did you experience any of the following health issues during your last trip? Issue: After you returned to the United States, did anyone travelling with you go to the hospital or a clinic for health issues that could have been caused by the travel?
	ctvfr_past_antimalarial	Numerical binary	1=Yes 0=No	For travelers in community, response is whether they used a prevention technique on their last trip. For travelers in the travel clinic, response among post-travel survey respondents whether they used the prevention technique on their recent trip. Prevention technique: take antimalarial
	ctvfr_past_nets	Numerical binary	1=Yes 0=No	For travelers in community, response is whether they used a prevention technique on their last trip. For travelers in the travel clinic, response among post-travel survey respondents whether they used the prevention technique on their recent trip. Prevention technique:
	ctvfr_past_repellent	Numerical binary	1=Yes 0=No	For travelers in community, response is whether they used a prevention technique on their last trip. For travelers in the travel clinic, response among post-travel survey respondents whether they used the prevention technique on their recent trip. Prevention technique:
	ctvfr_past_coil	Numerical binary	1=Yes 0=No	For travelers in community, response is whether they used a prevention technique on their last trip. For travelers in the travel clinic, response among post-travel survey respondents whether they used the prevention technique on their recent trip. Prevention technique:
	ctvfr_past_indoors	Numerical binary	1=Yes 0=No	For travelers in community, response is whether they used a prevention technique on their last trip. For travelers in the travel clinic, response among post-travel survey respondents whether they used the prevention technique on their recent trip. Prevention technique:
	ctvfr_past_clothes	Numerical binary	1=Yes 0=No	For travelers in community, response is whether they used a prevention technique on their last trip. For travelers in the travel clinic, response among post-travel survey respondents whether they used the prevention technique on their recent trip. Prevention technique:
	ctvfr_past_edu	Numerical binary	1=Yes 0=No	For travelers in community, response is whether they used a prevention technique on their last trip. For travelers in the travel clinic, response among post-travel survey respondents whether they used the prevention technique on their recent trip. Prevention technique:
	ctvfr_past_lodging	Numerical binary	1=Yes 0=No	For travelers in community, response is whether they used a prevention technique on their last trip. For travelers in the travel clinic, response among post-travel survey respondents whether they used the prevention technique on their recent trip. Prevention technique:
